1 **Limited window for donation of convalescent plasma with high live-**  
2 **virus neutralizing antibodies for COVID-19 immunotherapy**

3  
4 **Abhinay Gontu<sup>1,#</sup>, Sreenidhi Srinivasan<sup>2,#</sup>, Eric Salazar<sup>3,#</sup>, Meera Surendran Nair<sup>1</sup>, Ruth H.**  
5 **Nissly<sup>1</sup>, Denver Greenawalt<sup>1</sup>, Ian M. Bird<sup>1</sup>, Catherine Herzog<sup>2</sup>, Matthew J. Ferrari<sup>2,6</sup>, Indira**  
6 **Poojary<sup>2</sup>, Robab Katani<sup>2</sup>, Scott E. Lindner<sup>2,5</sup>, Allen M. Minns<sup>2,5</sup>, Randall Rossi<sup>2</sup>, Paul A.**  
7 **Christensen<sup>3</sup>, Brian Castillo<sup>3</sup>, Jian Chen<sup>3</sup>, Todd N. Eagar<sup>3,7</sup>, Xin Yi<sup>3,7</sup>, Picheng**  
8 **Zhao<sup>3</sup>, Christopher Leveque<sup>3</sup>, Randall J. Olsen<sup>3,7,8</sup>, David W. Bernard<sup>3,7</sup>, Jimmy Gollihar<sup>3,9</sup>,**  
9 **Suresh V. Kuchipudi<sup>1,10,\*</sup>, James M. Musser<sup>3,5,7,\*</sup>, and Vivek Kapur<sup>2,4,10,\*</sup>**

10

11 <sup>1</sup>Animal Diagnostic Laboratory, Department of Veterinary and Biomedical Sciences,  
12 Pennsylvania State University, University Park, Pennsylvania

13 <sup>2</sup>Huck Institutes of the Life Sciences, Pennsylvania State University, University Park,  
14 Pennsylvania

15 <sup>3</sup>Department of Pathology and Genomic Medicine, Houston Methodist Hospital, Houston, Texas

16 <sup>4</sup>Department of Animal Science, Pennsylvania State University, University Park, Pennsylvania

17 <sup>5</sup>Department of Biochemistry, Microbiology, and Molecular Biology, Pennsylvania State  
18 University, University Park, Pennsylvania

19 <sup>6</sup>Department of Biology, Pennsylvania State University, University Park, Pennsylvania

20 <sup>7</sup>Department of Pathology and Laboratory Medicine, Weill Cornell Medical College, New York,  
21 New York

22 <sup>8</sup>Center for Molecular and Translational Human Infectious Diseases, Houston Methodist  
23 Research Institute, Houston, Texas

24 <sup>9</sup>CCDC Army Research Laboratory-South, Austin, Texas

25 <sup>10</sup>Center for Infectious Disease Dynamics, Pennsylvania State University, University Park,  
26 Pennsylvania

27

28 #These authors contributed equally as co-first authors.

29

30 \*Correspondence to: Vivek Kapur, BVSc, PhD: 205 Wartik Laboratory, The Pennsylvania State

31 University, University Park, PA 16802; Phone: 1.814.863.9788; Email: [vkapur@psu.edu](mailto:vkapur@psu.edu);

32 James M. Musser, MD, PhD: 6565 Fannin St., B490, Houston, TX 77030; Phone:

33 1.713.441.5890; Email: [jmmusser@houstonmethodist.org](mailto:jmmusser@houstonmethodist.org);

34 Suresh V. Kuchipudi, BVSc, PhD: Wiley Lane, The Pennsylvania State University, University

35 Park, PA 16802; Phone 1.814.863.5737; Email: [skuchipudi@psu.edu](mailto:skuchipudi@psu.edu)

36 **One Sentence Summary**

37 Evaluation of SARS-CoV-2 anti-spike protein IgM, IgG, and live-virus neutralizing titer profiles  
38 reveals that the optimal window for donating convalescent plasma for use in immunotherapy is  
39 within the first 60 days of symptom onset.

40

41

42 **ABSTRACT**

43 The optimal timeframe for donating convalescent plasma to be used for COVID-19  
44 immunotherapy is unknown. To address this important knowledge deficit, we determined *in vitro*  
45 live-virus neutralizing capacity and persistence of IgM and IgG antibody responses against the  
46 receptor-binding domain and S1 ectodomain of the SARS-CoV-2 spike glycoprotein in 540  
47 convalescent plasma samples obtained from 175 COVID-19 plasma donors for up to 142 days  
48 post-symptom onset. Robust IgM, IgG, and viral neutralization responses to SARS-CoV-2  
49 persist, in the aggregate, for at least 100 days post-symptom onset. However, a notable  
50 acceleration in decline in virus neutralization titers  $\geq 160$ , a value suitable for convalescent  
51 plasma therapy, was observed starting 60 days after first symptom onset. Together, these  
52 findings better define the optimal window for donating convalescent plasma useful for  
53 immunotherapy of COVID-19 patients and reveal important predictors of an ideal plasma donor,  
54 including age and COVID-19 disease severity score.

55 **[MAIN TEXT]**

56 The kinetics and longevity of the antibody response to severe acute respiratory syndrome  
57 coronavirus 2 (SARS-CoV-2) are poorly understood. This knowledge is essential for determining  
58 if individuals have been infected, elucidating host and virus factors that influence the magnitude  
59 and persistence of serological responses, assessing whether an individual is sufficiently  
60 protected from re-infection, and evaluating the effectiveness of vaccination strategies to contain  
61 the pandemic. Additionally, understanding antibody kinetics and persistence is essential to  
62 determine correlates of live-virus neutralization (VN) titers required for qualifying donors of  
63 convalescent plasma for use in immunotherapy.

64         Antibodies directed to the SARS-CoV-2 surface spike glycoprotein (S) ectodomain  
65 (S/ECD) and receptor-binding domain (S/RBD) neutralize SARS-CoV-2 *in vitro*, and their titers  
66 can serve as effective surrogates for virus neutralization (VN)<sup>1-3</sup>. These titers have also been  
67 used to identify suitable convalescent plasma donors for COVID-19 immunotherapy<sup>1,3</sup>.  
68 However, there is considerable uncertainty about the robustness and persistence of the  
69 serological responses to SARS-CoV-2. Some reports suggest variable duration and resilience of  
70 serum IgG or IgM antibodies to S or other viral proteins<sup>2-4</sup>, whereas others report that  
71 serological and neutralizing responses begin to wane and approach undetectable levels within  
72 weeks after infection<sup>3-6</sup>.

73         To better understand the kinetics of the serological response to SARS-CoV-2, we  
74 determined the temporal profiles of IgM, IgG, and VN responses in a cohort of 175 convalescent  
75 plasma donors, including 105 who had donated multiple times. Plasma samples ( $n=540$ ) were  
76 collected up to 142 days after the onset of the donors' first symptoms [days post-symptom onset  
77 (DPO); Tables 1,S1]. We used a Fab fragment-based assay to assess total antibody titers  
78 against S/ECD and S/RBD, an isotype-specific assay to measure anti-S/RBD IgM and IgG  
79 titers, and a live-virus assay to determine SARS-CoV-2 VN titers<sup>1</sup>.

80 We discovered robust IgM, IgG, and VN responses in the majority of individuals, with  
81 moderate to strong correlation regardless of assay type (Figure 1a,b). Only 4 of 175 [2.3%; 95%  
82 confidence interval (CI): 0.9-5.7%] individuals had undetectable levels of IgG, IgM, or total  
83 antibody to S/RBD or S/ECD at initial sampling, whereas a significantly higher fraction (29 of  
84 114; 25.4%; 95% CI: 18.3-34.1%) had undetectable VN titers ( $z$ -score=6;  $P<0.01$ ). Thus, ~75%  
85 of RT-PCR-confirmed symptomatic individuals were serologically positive for anti-spike protein  
86 antibody, and their convalescent plasma had demonstrable ability to neutralize SARS-CoV-2 in  
87 VN assays.

88 We next determined the patterns of distribution of IgM and IgG background-corrected  
89 optical density (OD) values and titers over time (Figure 1c-f). Titers peaked at approximately 30  
90 DPO and persisted through 140 DPO (Figure 1c-f), with the IgG titer consistently higher than the  
91 IgM titer. The titer ratios began to diverge after 60 DPO (Figure 1d,f), but remained strongly  
92 correlated over the first 140 DPO (Pearson's  $r=0.71$ ; 95% CI: 0.67–0.75). The observed  
93 persistence of IgG responses in many convalescent individuals through 140 DPO is  
94 encouraging from the perspective of antibody durability to SARS-CoV-2. The data are  
95 consistent with the expected serological responses to rapidly replicating RNA viruses, including  
96 SARS-Cov-1<sup>7</sup>. In contrast, the persistence of IgM well beyond the acute phase was unexpected  
97 and differs from reports suggesting a rapid decline in IgM by 4-6 weeks<sup>7,8</sup>.

98 To further study the trajectory of antibody persistence, we performed survival analyses  
99 on IgM and IgG titers on all 540 samples obtained from 175 individual donors (Figure 2).  
100 Consistent with the temporal distribution of titers, survival analyses showed that the proportion  
101 of S/RBD IgG Fc seropositive convalescent individuals remained high through 140 DPO (Figure  
102 2a,b).

103 It is clear that antibodies directed against SARS-CoV-2 S/ECD and S/RBD neutralize the  
104 virus *in vitro*. Consistent with this, several vaccines targeting the S glycoprotein have shown  
105 promise in animal infection models and human clinical trials<sup>9-13</sup>. We and others have recently

106 reported that anti-S/RBD and S/ECD IgG titers are excellent surrogates for *in vitro* VN and help  
107 identify plasma donors for therapeutic uses<sup>1,14</sup>. Specifically, we have shown that anti-S/RBD or  
108 anti-S/ECD antibody titers of  $\geq 1350$  are strong proxies for a VN titer  $\geq 160$ , the FDA-  
109 recommended value for use in COVID-19 convalescent plasma therapy<sup>1</sup>, and transfusion of  
110 anti-S/RBD IgG  $\geq 1350$  titer plasma within 72 hours (h) of hospitalization significantly improves  
111 survival and health outcomes<sup>15,16</sup>.

112 Our large and well-characterized convalescent plasma library with longitudinally donated  
113 samples enabled detailed assessment of VN response persistence. We found that the  
114 proportion of individuals with a VN titer  $\geq 160$  remained above 80% through the first 60 DPO but  
115 declined sharply to less than 20% between DPO 61 and 120 (Figure 2c). These results suggest  
116 that the time period in which donated convalescent plasma is likely to have a high VN titer and  
117 optimal therapeutic potential is within the first 60 DPO. This has important implications for  
118 convalescent plasma donation and passive immunotherapy programs, some of which have  
119 already transfused more than 60,000 individuals in the United States as of August 13, 2020  
120 (<https://www.uscovidplasma.org>).

121 Facile methods to identify suitable convalescent plasma donors are needed as the gold  
122 standard live-virus VN assays used herein are labor intensive, cumbersome, take several days  
123 to perform, and require specialized expertise and access to a high containment (Biosafety Level  
124 3) laboratory and regulatory clearances. ELISAs are easier to implement than VN assays,  
125 especially in resource-limited countries and environments. We previously reported that an  
126 S/RBD  $\geq 1350$  titer may serve as a good marker for identifying plasma donors with VN  $\geq 160$ <sup>1</sup>  
127 (Supplementary Table S2). Here we confirm a high positive likelihood ratio (LR+; 13.43) for a  
128 VN  $\geq 160$  when S/RBD titers are  $\geq 1350$  early (1-30 DPO) post onset of symptoms  
129 (Supplementary Table S2). However, extended longitudinal analyses through 140 DPO show  
130 that S/ECD and S/RBD  $\geq 1350$  persist longer than VN  $\geq 160$ , with significantly different survival  
131 curves ( $P < 0.001$ ) for 1-140 DPO and overall LRs+ of 1.34 for S/ECD and 1.61 for S/RBD

132 (Figure 2c,d; Supplementary Table S2). Thus, an S/RBD  $\geq 1350$  titer is a promising marker for  
133 identifying suitable plasma donors early, but not late, after first symptom onset. In contrast,  
134 S/RBD IgG  $\geq 1350$  appears to be a reliable predictor of VN  $\geq 160$ , and S/RBD IgG  $\geq 1350$  survival  
135 is statistically indistinguishable from that of VN  $\geq 160$  (Figure 2e), with an overall LR+ of 3.18 and  
136 a negative likelihood ratio (LR-) of 0.26 (Supplementary Table S2).

137 We next investigated the survival and predictive values of S/RBD IgM  $\geq 450$  as compared  
138 to VN  $\geq 160$  (Figure 2f, Supplementary Table S2). An S/RBD IgM titer  $\geq 450$  was selected  
139 because the magnitude of IgM response was approximately three-fold lower than that of IgG  
140 (Figure 1f). The results showed that S/RBD IgM  $\geq 450$  had a similar survival profile to VN  $\geq 160$   
141 but waned significantly faster ( $P < 0.01$ ; Figure 2f). While S/RBD IgM  $\geq 450$  had an overall LR+ of  
142 3.72, it also had a LR- of 0.69, which would likely result in an unacceptable number of suitable  
143 donors with VN  $\geq 160$  being excluded. Together, these results indicate that S/RBD IgG  $\geq 1350$ ,  
144 but not IgM  $\geq 450$  or S/RBD or S/ECD total antibody  $\geq 1350$ , serves as a good marker to identify  
145 suitable plasma donors for COVID-19 immunotherapy.

146 To determine the kinetics and persistence of IgM, IgG, and VN responses, we next  
147 performed longitudinal analyses of the initial and final observed titers in 105 subjects with  
148 multiple plasma donations [median 4 donations, interquartile range (IQR): 2-6; median interval  
149 between initial and final donation of 42 days (range 6-101; IQR: 26-68), Extended Data Figure  
150 1]. The data confirm the robustness of IgG and IgM levels through the 140 DPO observation  
151 period. All individuals with a detectable starting titer remained, on average, between one or two  
152 dilutions above or below the initial titer (Extended Data Figure 1). Of particular note, only 5 of 60  
153 individuals (8.3%, 95% CI: 2.8-18.4%) with an initial VN titer of  $\geq 5.3$  (1:40) showed a  
154 subsequent increase in titer, emphasizing the importance of recruiting and screening  
155 convalescent plasma donors quickly, as VN titers are unlikely to rise from initial levels.

156 We next assessed whether particular donor characteristics predicted a more robust  
157 serological and neutralization response. The results show that individuals 30 years of age or

158 younger had significantly lower VN, IgG and IgM antibody titers than those in the older age  
159 groups (Figure 3a). Individuals between 20-30 years of age also had significantly faster decline  
160 in IgG ( $P < 0.05$ ) and IgM ( $P < 0.05$ ) than did those  $> 60$  years of age (Figure 3b-d, Extended  
161 Figure 2a). Consistent with recent evidence that disease severity correlates with the magnitude  
162 and duration of serological response<sup>1,17,18</sup>, we found that individuals with disease severity scores  
163 of 4 or 5 on a 5-point disease severity scale had significantly higher IgM and IgG antibody titers  
164 than those with lower severity scores (Figure 3e). In addition, survival analyses of IgG and IgM  
165 antibody titers revealed that individuals with mild/moderate symptoms scores of 1, 2, or 3 had  
166 significantly different survival curves for IgM ( $P < 0.001$ ) and VN ( $P < 0.05$ ) than did those with  
167 higher disease severity scores (3f-h, Extended Figure 2b). Notably, all individuals with high  
168 severity scores had detectable IgM at their last measurement point, as did all individuals who  
169 were  $> 60$  years of age. This may be indicative of potential confounding or interaction between  
170 age and disease severity affecting the magnitude and persistence of serological response. The  
171 rate of loss of IgM seropositivity to S/RBD was significantly higher for the youngest (20-30  
172 years) compared to the oldest ( $> 60$  years) age groups (log-rank test,  $P < 0.01$ ), and this effect  
173 remained significant when individuals with high severity scores were excluded. Age and severity  
174 score were only weakly correlated (Spearman rank correlation = 0.08;  $P = .07$ ), but formal analysis  
175 of confounding or interactions between age and severity was precluded due to data frailty and  
176 requires further study. Regardless, these findings suggest that convalescent individuals  $< 30$   
177 years of age and those with lower disease severity scores are less likely to represent suitable  
178 donors of convalescent plasma for immunotherapy for COVID-19 patients than individuals in  
179  $> 30$  age group with a history of more severe disease. Finally, the results show that individuals  
180 with dyspnea had significantly higher VN, IgG and IgM and antibody titers than those who did  
181 not (Figure 3i), and IgM seropositivity declined significantly faster in individuals with dyspnea  
182 (log-rank test,  $P < 0.0001$ ) (Figure 3j-l).

183



184 In conclusion, these data refine our understanding of the kinetics, magnitude, and  
185 durability of human serologic responses to SARS-CoV-2 spike protein, the primary vaccine  
186 candidate being studied worldwide. This integrative analysis of serological and VN profiles  
187 identifies an optimal donation window of up to 60 DPO for high-titer anti-spike protein  
188 convalescent plasma as immunotherapy for COVID-19 patients. Our analysis found that  
189 additional characteristics of an ideal potential donor include a recovered patient >30 years old  
190 with a high COVID-19 disease severity score. In the aggregate, these data permit a more  
191 focused strategy for identifying suitable donors for COVID-19 convalescent plasma and passive  
192 immunotherapy programs.

193

#### 194 **Online Methods**

195

196 **Data Availability.** All data generated or analyzed during this study are included in this  
197 published article (and its supplementary information files) or will be made available by the  
198 authors on reasonable request.

199

#### 200 **Cohort and sample description**

201 Plasma samples (n=540) from 175 COVID-19 convalescent patients collected at Houston  
202 Methodist Hospital in Houston, Texas were included in the study. Patients were confirmed to be  
203 positive for SARS-CoV-2 by RT-PCR. The severity of infection in these patients was scored on  
204 a scale of 1-5, (median 2, IQR: 1-2). Clinical improvement relative to DPO 0 was defined as a 1  
205 point improvement in ordinal scale [1, discharged (alive); 2, not hospitalized, experiencing  
206 dyspnea not requiring supplemental oxygen but requiring ongoing medical care (for COVID-19  
207 or otherwise); 3, hospitalized, requiring low-flow supplemental oxygen; 4, hospitalized, on non-  
208 invasive ventilation or high-flow oxygen devices; 5, hospitalized and on invasive mechanical  
209 ventilation or extracorporeal membrane oxygenation (ECMO)].

210 Per FDA guidelines (<https://www.fda.gov/vaccines-blood-biologics/investigational-new->  
211 [drug-ind-or-device-exemption-ide-process-cber/recommendations-investigational-covid-19-](https://www.fda.gov/vaccines-blood-biologics/investigational-new-drug-ind-or-device-exemption-ide-process-cber/recommendations-investigational-covid-19-convalescent-plasma#Patient%20Eligibility)  
212 [convalescent-plasma#Patient%20Eligibility](https://www.fda.gov/vaccines-blood-biologics/investigational-new-drug-ind-or-device-exemption-ide-process-cber/recommendations-investigational-covid-19-convalescent-plasma#Patient%20Eligibility)), all subjects were asymptomatic for at least 14 days  
213 at the time of plasma collection. Of the 175 subjects, 105 eligible individuals underwent  
214 plasmapheresis and donated plasma at least twice (range 2-12 times). All donors were  
215 confirmed negative for SARS-CoV-2 by RT-PCR and provided written consent before  
216 plasmapheresis. The study cohort consisted of 88 females (50.3%) and 87 males (49.7%),  
217 ranging in age between 20-78 years (median 46, IQR: 36-54). Samples were collected from 17-  
218 142 DPO (median 68 days, IQR: 48-93). Plasma from donors was collected with the transfusion  
219 apheresis system (Trima Accel® Terumo BCT) and standard blood banking protocols were  
220 followed. An aliquot of collected plasma was tested for antibodies by ELISA and/or VN assays.  
221 Cohort characteristics are described in Table 1 and Supplementary Table 1.

222

### 223 **Study approvals**

224 Informed consent was obtained from either the patient or an authorized representative of the  
225 patient when applicable for collection of plasma samples. All procedures were approved by the  
226 Institutional Review Board of Houston Methodist Hospital (IRB# PRO00025121). Serological  
227 analyses were performed at the Pennsylvania State University under BSL-2 (ELISA assays) and  
228 BSL-3 (VNs) conditions, following the Pennsylvania State University Institutional Biosafety  
229 Committee (IBC) approved protocols.

230

### 231 **Quantitative estimation of antibodies against SARS-CoV-2**

232 SARS-CoV-2 antibodies in plasma samples were detected and quantified against purified  
233 recombinant SARS-CoV-2 spike ectodomain (S/ECD) or receptor-binding domain (S/RBD)  
234 proteins using in-house indirect Fab antibody-based or isotype-specific (IgM and IgG) ELISA  
235 assays. The protocols were performed as previously described<sup>1,19</sup> and deposited in protocols.io

236 (dx.doi.org/10.17504/protocols.io.bivgke3w). Two isotypes of CR3022, a human monoclonal  
237 antibody reactive to spike regions of SARS-CoV-1 and SARS-CoV-2, were used as positive  
238 controls in the assays (IgG1: Ab01680-10.0; IgM: Ab01680-15.0, Absolute Antibody, USA). The  
239 cutoff for the assays was determined as an optical density (absorbance at 450 nm) higher than  
240 three or six standard deviations above the mean of the tested pre-COVID-19 serum samples  
241 ( $n=100$ ). Sample titers were estimated as reciprocals of the highest dilution resulting in an OD  
242 greater than the cutoff. The class specificity of the IgM ELISA was tested by treating the plasma  
243 samples ( $n=10$ ) with 1,4-Dithiothreitol (DTT, 10708984001, Millipore Sigma, USA) as previously  
244 described<sup>20</sup>. Briefly, samples were allowed to react with 0.005 M DTT in PBS at  $36\pm 2^\circ\text{C}$  for 30  
245 min and then tested with isotype-specific ELISAs for titer estimation (Extended data Figure 3).

246

#### 247 **Virus neutralization assay**

248 The VN titers of the plasma samples were quantified on a cell-based assay using SARS-CoV-2  
249 strain USA-WA1/2020 (NR-52281-BEI Resources, USA) based on procedures described  
250 previously<sup>1,21</sup>. Briefly, Vero E6 cells (CRL-1586, ATCC, USA) were grown as monolayers in 96-  
251 well microtiter plates. Heat-inactivated plasma samples were diluted two-fold in triplicate and  
252 incubated with 100 tissue culture infective dose 50 (TCID<sub>50</sub>) of the virus at 5% CO<sub>2</sub> at  $36\pm 2^\circ\text{C}$   
253 for 60 min. This plasma-virus mixture was added to cell monolayers and incubated further for 72  
254 h at 5% CO<sub>2</sub> at  $36\pm 2^\circ\text{C}$ . Plates were treated with crystal violet formaldehyde stain for 1 h and  
255 visually inspected for cytopathic effect (CPE) or protection. The reciprocal of the highest dilution  
256 of the plasma where at least two of the three wells were protected (no CPE) was determined as  
257 the VN titer of the sample.

258

#### 259 **Statistical analyses**

260 Tests for normality were performed using the Kolmogorov-Smirnov test and a  $P$  value of  $<0.05$   
261 was considered statistically significant. Data dispersion was indexed by standard errors of mean

262 or quartile and IQR. The agreement between the various assays was determined using Pearson  
263 correlation coefficient with  $\log_2$ -transformed titers. The non-parametric regression method  
264 LOESS was used for scatterplot smoothing to visualize antibody trajectories. The `geom_smooth`  
265 (`method="loess"`) function in R was used with default span of 0.75. The proportion of the sample  
266 population remaining seropositive over the 100-day period was determined using a log-rank test  
267 and Kaplan-Meier survival curves were plotted with “survival” and “survminer” packages in R  
268 Studio<sup>22-24</sup>. Statistical differences in antibody titers and survival curves of patient  
269 characteristics—including severity score, age, and presence of dyspnea—were analyzed using  
270 one-way ANOVAs (Tukey’s multiple comparison tests) and a log-rank test, respectively.  
271 Individual level interval-censored data were used to fit semi-parametric accelerated failure time  
272 models using the `icenReg` R package. `DTComPair` R package ([https://cran.r-](https://cran.r-project.org/web/packages/DTComPair/DTComPair.pdf)  
273 [project.org/web/packages/DTComPair/DTComPair.pdf](https://cran.r-project.org/web/packages/DTComPair/DTComPair.pdf)) was used to compare the sensitivity,  
274 specificity, and positive and negative predictive values for detection of S/RBD, S/ECD, and  
275 S/RBD IgG titers  $\geq 1350$ , as well as S/RBD IgM titer  $\geq 450$  using VN titer  $\geq 160$  as the gold  
276 standard. Positive and negative predictive values were compared with the generalized score  
277 statistics, whereas the sensitivity and specificity were compared using an exact  
278 binomial test. All analyses were completed using R (versions 3.6.1 or 3.6.3) within R Studio  
279 (version 1.2.5019) or Graphpad PRISM 8 (version 8.4.3).

280

## 281 **[Acknowledgments]**

282 We are deeply indebted to all of our volunteer plasma donors for their time, their generous gift,  
283 and their solidarity. We thank Katharine G. Dlouhy, Curt Hampton, and their team of  
284 coordinators and recruiters for outstanding efforts; and Monisha Dey, Cheryl Chavez-East, John  
285 Rogers, Dr. Ahmed Shehabeldin, Dr. David Joseph, Guy Williams, Karen Thomas, and Curt  
286 Hampton who were instrumental in efficiently managing the donor center; Drs. Jessica Thomas  
287 and Zejuan Li, Erika Walker, the very talented and dedicated molecular technologists, and the

288 many labor pool volunteers in the Molecular Diagnostics Laboratory for their dedication to  
289 patient care; the many donor center and blood bank phlebotomists and technologists for their  
290 dedication to donor and blood safety; Drs. Heather McConnell and Sasha M. Pejerrey for  
291 outstanding editorial assistance; Brandi Robinson, Harrold Cano, and Cory Romero for technical  
292 assistance; Claude Moussa, Heather Patton, and the many members of the laboratory  
293 information technology team for rapidly implementing the necessary electronic workflows;  
294 Pamela McShane, Dilzi Mody, and the many members of the biorepository team for their  
295 meticulous management of patient samples; and Christina Talley, Dr. Susan Miller, and Mary  
296 Clancy for consistent, thorough, and outstanding advice. We express our gratitude to Manuel  
297 Hinojosa and Mark Vassallo for their extensive efforts to rapidly procure resources, and Dr.  
298 Roberta Schwartz for her efforts in implementing screening of asymptomatic individuals. We are  
299 indebted to Drs. Marc Boom and Dirk Sostman for their support, and to many very generous  
300 Houston citizens and businesses for their tremendous philanthropic support of this ongoing  
301 project, including but not limited to anonymous, Ann and John Bookout III, Carolyn and John  
302 Bookout, Ting Tsung and Wei Fong Chao Foundation, Ann and Leslie Doggett, Freeport LNG,  
303 the Hearst Foundations, Jerold B. Katz Foundation, C. James and Carole Walter Looke, Diane  
304 and David Modesett, the Sherman Foundation, Paula and Joseph C. "Rusty" Walter III, and  
305 Aramco Americas. Dr. Jason S. McLellan (University of Texas at Austin) graciously provided the  
306 mAb CR3022 and the spike protein expression vectors, and we thank the members of the  
307 Center for Systems and Synthetic Biology at the University of Texas at Austin for technical  
308 assistance. We thank Zivko Nikolov, Susan Woodard, and Michael Johanson at the National  
309 Center for Therapeutics Manufacturing at Texas A&M University for production of antigen. We  
310 thank Terumo BCT for continuously and rapidly supplying blood collection devices and supplies,  
311 and Victoria Cavener and Team COVID-19 serology at Penn State for their timely and generous  
312 technical assistance and logistical support. This study was supported by the Fondren  
313 Foundation, Houston Methodist Research Institute (to JMM). This research has been funded in

314 whole or part with federal funds under a contract from the National Institute of Allergy and  
315 Infectious Diseases, National Institutes of Health, Contract Number 75N93019C00050 (to JL  
316 and GCI). A portion of this work was funded through Cooperative Agreement W911NF-12-1-  
317 0390 by the Army Research Office (to JDG). We gratefully acknowledge the unwavering support  
318 and timely seed funding from the Huck Institutes of the Life Sciences for the studies at Penn  
319 State together with the Huck Distinguished Chair in Global Health award (to VK).

320

### 321 **Author Contributions**

322 Project concept (AG, SS, ES, SVK, JMM, VK); acquired data (AG, SS, ES, MSN, RHN, DG,  
323 IMB, IP, RK, SEL, AMM, RR, PAC, BC, JC, TNE, XY, PZ, CL, RJO, DWB, JG); analyzed data  
324 (AG, SS, MSN, CH, MJF, SVK, JMM, VK); wrote manuscript (VK, JMM, AG, SS, SVK);  
325 prepared figures (AG, SS, MSN, CH, VK). All authors reviewed the manuscript and gave final  
326 approval for publication.

327

### 328 **Competing Interests**

329 ES is the local principal investigator for a clinical trial sponsored by Regeneron assessing an  
330 investigational therapy for COVID-19.

331

## 332 References

- 333 1. Salazar, E., *et al.* Relationship between Anti-Spike Protein Antibody Titers and SARS-  
334 CoV-2 In Vitro Virus Neutralization in Convalescent Plasma. *bioRxiv* (2020).
- 335 2. Iyer, A.S., *et al.* Dynamics and significance of the antibody response to SARS-CoV-2  
336 infection. *medRxiv*, 2020.2007.2018.20155374 (2020).
- 337 3. Wajnberg, A., *et al.* SARS-CoV-2 infection induces robust, neutralizing antibody  
338 responses that are stable for at least three months. *medRxiv*, 2020.2007.2014.20151126  
339 (2020).
- 340 4. Ibarondo, F.J., *et al.* Rapid Decay of Anti-SARS-CoV-2 Antibodies in Persons with  
341 Mild Covid-19. *New England Journal of Medicine* (2020).
- 342 5. Long, Q.-X., *et al.* Clinical and immunological assessment of asymptomatic SARS-CoV-  
343 2 infections. *Nature Medicine* **26**, 1200-1204 (2020).
- 344 6. Seow, J., *et al.* Longitudinal evaluation and decline of antibody responses in SARS-CoV-  
345 2 infection. *medRxiv*, 2020.2007.2009.20148429 (2020).
- 346 7. Sethuraman, N., Jeremiah, S.S. & Ryo, A. Interpreting Diagnostic Tests for SARS-CoV-  
347 2. *Jama* (2020).
- 348 8. Liu, X., *et al.* Patterns of IgG and IgM antibody response in COVID-19 patients. *Emerg*  
349 *Microbes Infect* **9**, 1269-1274 (2020).
- 350 9. Zhu, F.C., *et al.* Safety, tolerability, and immunogenicity of a recombinant adenovirus  
351 type-5 vectored COVID-19 vaccine: a dose-escalation, open-label, non-randomised, first-  
352 in-human trial. *Lancet* **395**, 1845-1854 (2020).
- 353 10. Jackson, L.A., *et al.* An mRNA Vaccine against SARS-CoV-2 - Preliminary Report. *N*  
354 *Engl J Med* (2020).
- 355 11. Bar-Zeev, N. & Moss, W.J. Encouraging results from phase 1/2 COVID-19 vaccine  
356 trials. *Lancet* **396**, 448-449 (2020).
- 357 12. Folegatti, P.M., *et al.* Safety and immunogenicity of the ChAdOx1 nCoV-19 vaccine  
358 against SARS-CoV-2: a preliminary report of a phase 1/2, single-blind, randomised  
359 controlled trial. *Lancet* **396**, 467-478 (2020).
- 360 13. Zhu, F.C., *et al.* Immunogenicity and safety of a recombinant adenovirus type-5-vectored  
361 COVID-19 vaccine in healthy adults aged 18 years or older: a randomised, double-blind,  
362 placebo-controlled, phase 2 trial. *Lancet* **396**, 479-488 (2020).
- 363 14. Tan, C.W., *et al.* A SARS-CoV-2 surrogate virus neutralization test based on antibody-  
364 mediated blockage of ACE2-spike protein-protein interaction. *Nat Biotechnol* (2020).
- 365 15. Salazar, E., *et al.* Treatment of COVID-19 Patients with Convalescent Plasma Reveals a  
366 Signal of Significantly Decreased Mortality. *Am J Pathol* (2020).
- 367 16. Joyner, M.J., *et al.* Effect of Convalescent Plasma on Mortality among Hospitalized  
368 Patients with COVID-19: Initial Three-Month Experience. *medRxiv*,  
369 2020.2008.2012.20169359 (2020).
- 370 17. Lee, N., *et al.* Anti-SARS-CoV IgG response in relation to disease severity of severe  
371 acute respiratory syndrome. *J Clin Virol* **35**, 179-184 (2006).
- 372 18. Lynch, K.L., *et al.* Magnitude and kinetics of anti-SARS-CoV-2 antibody responses and  
373 their relationship to disease severity. *Clin Infect Dis* (2020).
- 374 19. Stadlbauer, D., *et al.* SARS-CoV-2 Seroconversion in Humans: A Detailed Protocol for a  
375 Serological Assay, Antigen Production, and Test Setup. *Curr Protoc Microbiol* **57**, e100  
376 (2020).

- 377 20. Okuno, T. & Kondelis, N. Evaluation of dithiothreitol (DTT) for inactivation of IgM  
378 antibodies. *J Clin Pathol* **31**, 1152-1155 (1978).
- 379 21. Sui, J., *et al.* Potent neutralization of severe acute respiratory syndrome (SARS)  
380 coronavirus by a human mAb to S1 protein that blocks receptor association. *Proc Natl*  
381 *Acad Sci U S A* **101**, 2536-2541 (2004).
- 382 22. R Development Core Team. R: a language and environment for statistical computing. (R  
383 Foundation for Statistical Computing, Vienna, Austria, 2014).
- 384 23. Therneau, T.M. A Package for Survival Analysis in R (Springer, New York, 2020).
- 385 24. Kassambara and Kosinski. “Survminer: Drawing Survival Curves using “ggplot2”.”  
386 (2018).  
387



388 **Figure Legends**

389 **Figure 1. Distribution, correlation, and trajectories of antibody titers against SARS-CoV-2.**

390 (a) Violin plots showing distribution of virus neutralization titers ( $n=305$ ); total antibody ( $n=538$ ),  
391 and specific isotype antibody IgG and IgM ( $n=540$ ) titers to SARS-CoV-2 spike-ectodomain  
392 (S/ECD) and spike-receptor binding domain (S/RBD) in convalescent plasma samples ( $\text{Log}_2$   
393 transformed values). The means of the distribution among the titers were significantly different,  
394 except between S/ECD and S/RBD [One-way ANOVA, Tukey's multiple comparison (mixed-  
395 effects model),  $P<0.05$ ]. The dashed line at  $\text{Log}_2$  titer represents VN titer of 1:160. (b) Pairwise  
396 comparison of the assays show a moderate to strong correlation between the total and isotype  
397 specific IgG and IgM antibody estimates with virus neutralization assays. (c) & (d) Optical  
398 density (OD) (at 450nm) for the indirect ELISAs indicating total or isotype specific IgG and IgM  
399 antibody levels; (e) & (f) Titers of the total or isotype specific IgG and IgM antibodies. The IgG  
400 and IgM titers appear to peak around 30 days post onset (DPO) of symptoms. High IgG titers  
401 persist until 140 DPO, while IgM titers trend lower but persist until 140 DPO. (g) Neutralizing  
402 antibody titers persist until 140 DPO. A locally estimated scatterplot smoothing (LOESS)  
403 regression curve is fitted to the data.

404

405 **Figure 2. Survival analysis of IgG and IgM antibody titers to SARS-CoV-2 spike-receptor**

406 **binding domain (S/RBD) in 540 samples and virus neutralizing antibody (VN) titers in 305**

407 **samples collected from convalescent individuals ( $n=175$ ) during the first 140 days post**

408 **onset of symptoms (DPO). (a) Proportion of S/RBD IgG seropositive convalescent individuals**

409 remains high through 140 DPO, while IgM seropositivity remains high through the first 60 DPO

410 and then steadily declines over the next 60 days (Log rank test; \*\*\*\* $P<0.0001$ ). The proportion

411 of individuals with VN responses also begins to decline 60 DPO, with ~50% of individuals

412 remaining seropositive with VN test through 140 DPO (Log rank test; \*\*\* $P<0.001$ ). (b) Violin

413 plots showing a significant decline in VN and IgM titers with time (Ordinary one-way ANOVA,

414 Tukey's multiple comparison test;  $*P<0.05$ ;  $**P<0.01$ ); the IgG titers remain stable until after 120  
415 DPO. Comparison of proportion of individuals seropositive with S/RBD, S/ECD, and S/RBD IgG  
416 titers  $\geq 1350$  as well as with S/RBD IgM titer  $\geq 450$  to the proportion of individuals possessing VN  
417 titers  $\geq 160$  through 140 DPO are depicted in c, d, e, and f respectively ( $***P<0.001$ ;  
418  $****P<0.0001$ ).

419

420 **Figure 3. Distribution of antibody titers against SARS-CoV-2 based on age, severity**

421 **scores, and presence of dyspnea.** These data represent samples collected from convalescent  
422 individuals ( $n=175$ ) during the first 140 days post symptom onset (DPO). (a) Individuals  $<31$   
423 years of age have significantly lower IgG, IgM, and viral neutralizing antibody (VN) titers than  
424 those  $>40$  years of age in this cohort (Ordinary one-way ANOVA, Tukey's multiple comparison  
425 test;  $**P<0.01$ ;  $***P<0.001$ ;  $****P<0.0001$ ). Survival analysis of (b) IgG, (c) IgM, and (d) VN  
426 antibody titers during the first 140 DPO in convalescent individuals within the age groups of 20-  
427 30 ( $n=95$  samples) and  $>60$  ( $n=45$  samples) (Log-rank test,  $*P<0.05$  for IgG and IgM,  $P>0.05$  for  
428 VN antibodies). (e) Individuals with a severity score of 1 have significantly lower IgM and IgG  
429 titers than those above a score of 3 (Ordinary one-way ANOVA, Tukey's multiple comparison  
430 test;  $**P<0.01$ ;  $***P<0.001$ ;  $****P<0.0001$ ). Survival analysis of (f) IgG, (g) IgM, and (h) VN  
431 antibody titers in relation to severity scores grouped as mild (1/2/3) and severe (4/5) in  
432 convalescent individuals during the first 140 DPO (Log-rank test,  $P>0.05$  for IgG,  $****P<0.0001$   
433 for IgM,  $*P<0.05$  for VN antibodies). (i) Individuals with dyspnea had significantly higher VN,  
434 IgM, and IgG titers (Ordinary one-way ANOVA, Tukey's multiple comparison test;  $**P<0.01$ ;  
435  $****P<0.0001$ ). Survival analysis of (j) IgG, (k) IgM, and (l) VN antibody titers in relation to  
436 occurrence of dyspnea in convalescent individuals during the first 140 DPO (Log-rank test,  
437  $P>0.05$  for IgG,  $****P<0.0001$  for IgM,  $P>0.05$  for VN).

438

439 **Extended Data Figure 1. Trajectories (first and last donation only) of (a) SARS-CoV-2**  
440 **spike-receptor binding domain (S/RBD) IgM, (b) S/RBD IgG, and (c) virus neutralizing**  
441 **(VN) antibody titers against SARS-CoV-2 in subjects who donated plasma more than**  
442 **once.** Initial ( $\text{Log}_2$ ) S/RBD IgM and IgG titers  $\geq 5.3$  remain stable or vary by one or two dilutions  
443 below or above the initial titer. A majority of individuals (33 out of 39) with initial ( $\text{Log}_2$ ) VN titers  
444  $\geq 7.3$  begin to drop beyond ~60 DPO.

445  
446 **Extended Data Figure 2. Survival analysis of SARS-CoV-2 spike ectodomain (S/ECD),**  
447 **SARS-CoV-2 spike-receptor binding domain (S/RBD), S/RBD IgM, S/RBD IgG, and**  
448 **neutralizing (VN) antibody titers in 175 convalescent individuals during the first 140 days**  
449 **post onset (DPO) of symptoms stratified by (a) age and (b) severity (Log-rank test,**  
450  **$*P < 0.05$ ,  $**P < 0.01$ ).** Significant differences were observed in the titers of ELISAs between the  
451 age groups: 20-30 versus 31-40 (S/ECD  $**P < 0.01$ , S/RBD IgG  $*P < 0.05$ ); 20-30 versus 41-50  
452 (S/ECD  $*P < 0.05$ , S/RBD IgG  $*P < 0.05$ , S/RBD IgM  $*P < 0.05$ , VN  $*P < 0.05$ ); 20-30 versus 51-60  
453 (S/ECD  $**P < 0.01$ , S/RBD  $*P < 0.05$ , S/RBD IgG  $*P < 0.05$ , S/RBD IgM  $**P < 0.01$ , VN  $*P < 0.05$ ); 20-  
454 30 versus  $>60$  (S/RBD IgM  $*P < 0.05$ ); and 31-40 versus 51-60 (S/RBD IgM  $*P < 0.05$ ). Significant  
455 differences were observed in the S/RBD IgM titers of the donors with the severity scores 1  
456 versus 3 ( $*P < 0.05$ ); 1 versus 4,5 ( $**P < 0.01$ ); and 2 versus 4,5 ( $**P < 0.01$ ).

457  
458 **Extended Data Figure 3. Class specificity test for SARS-CoV-2 spike-receptor binding**  
459 **domain (S/RBD) isotype specific indirect ELISAs.** 1,4-Dithiothreitol (DTT) treatment of  
460 convalescent plasma abrogates S/RBD IgM antibody titers but not IgG titers (n=10) (paired t  
461 test,  $****P < 0.0001$ ).

462  
463 **Extended Data Figure 4. Forest plot depicting the positive and negative predictive values**  
464 **for detection of SARS-CoV-2 spike-receptor binding domain (S/RBD), SARS-CoV-2 spike**

465 **ectodomain (S/ECD), and S/RBD IgG titers  $\geq 1350$  using virus neutralization (VN) titer  $\geq 160$**   
466 **as the standard.** Likelihood ratios (LR) for each assay are shown on the right panel. P values  
467 were generated using the generalized score statistic for pairwise comparisons. For positive  
468 predictive values (PPV) S/ECD  $\geq 1350$  versus S/RBD  $\geq 1350$   $**P < 0.01$ ; S/RBD  $\geq 1350$  versus  
469 S/RBD IgG  $\geq 1350$   $***P < 0.001$ ; S/RBD IgG  $\geq 1350$  versus S/RBD IgM  $\geq 450$   $P > 0.05$ ; S/RBD IgM  
470  $\geq 450$  versus S/RBD  $\geq 1350$   $***P < 0.001$ . For negative predictive values (NPV) S/ECD  $\geq 1350$   
471 versus S/RBD  $\geq 1350$   $**P < 0.01$ ; S/RBD  $\geq 1350$  versus S/RBD IgG  $\geq 1350$   $P > 0.05$ ; S/RBD IgG  
472  $\geq 1350$  versus S/RBD IgM  $\geq 450$   $****P < 0.0001$ ; S/RBD IgM  $\geq 450$  versus S/RBD 1350  
473  $****P < 0.0001$ .

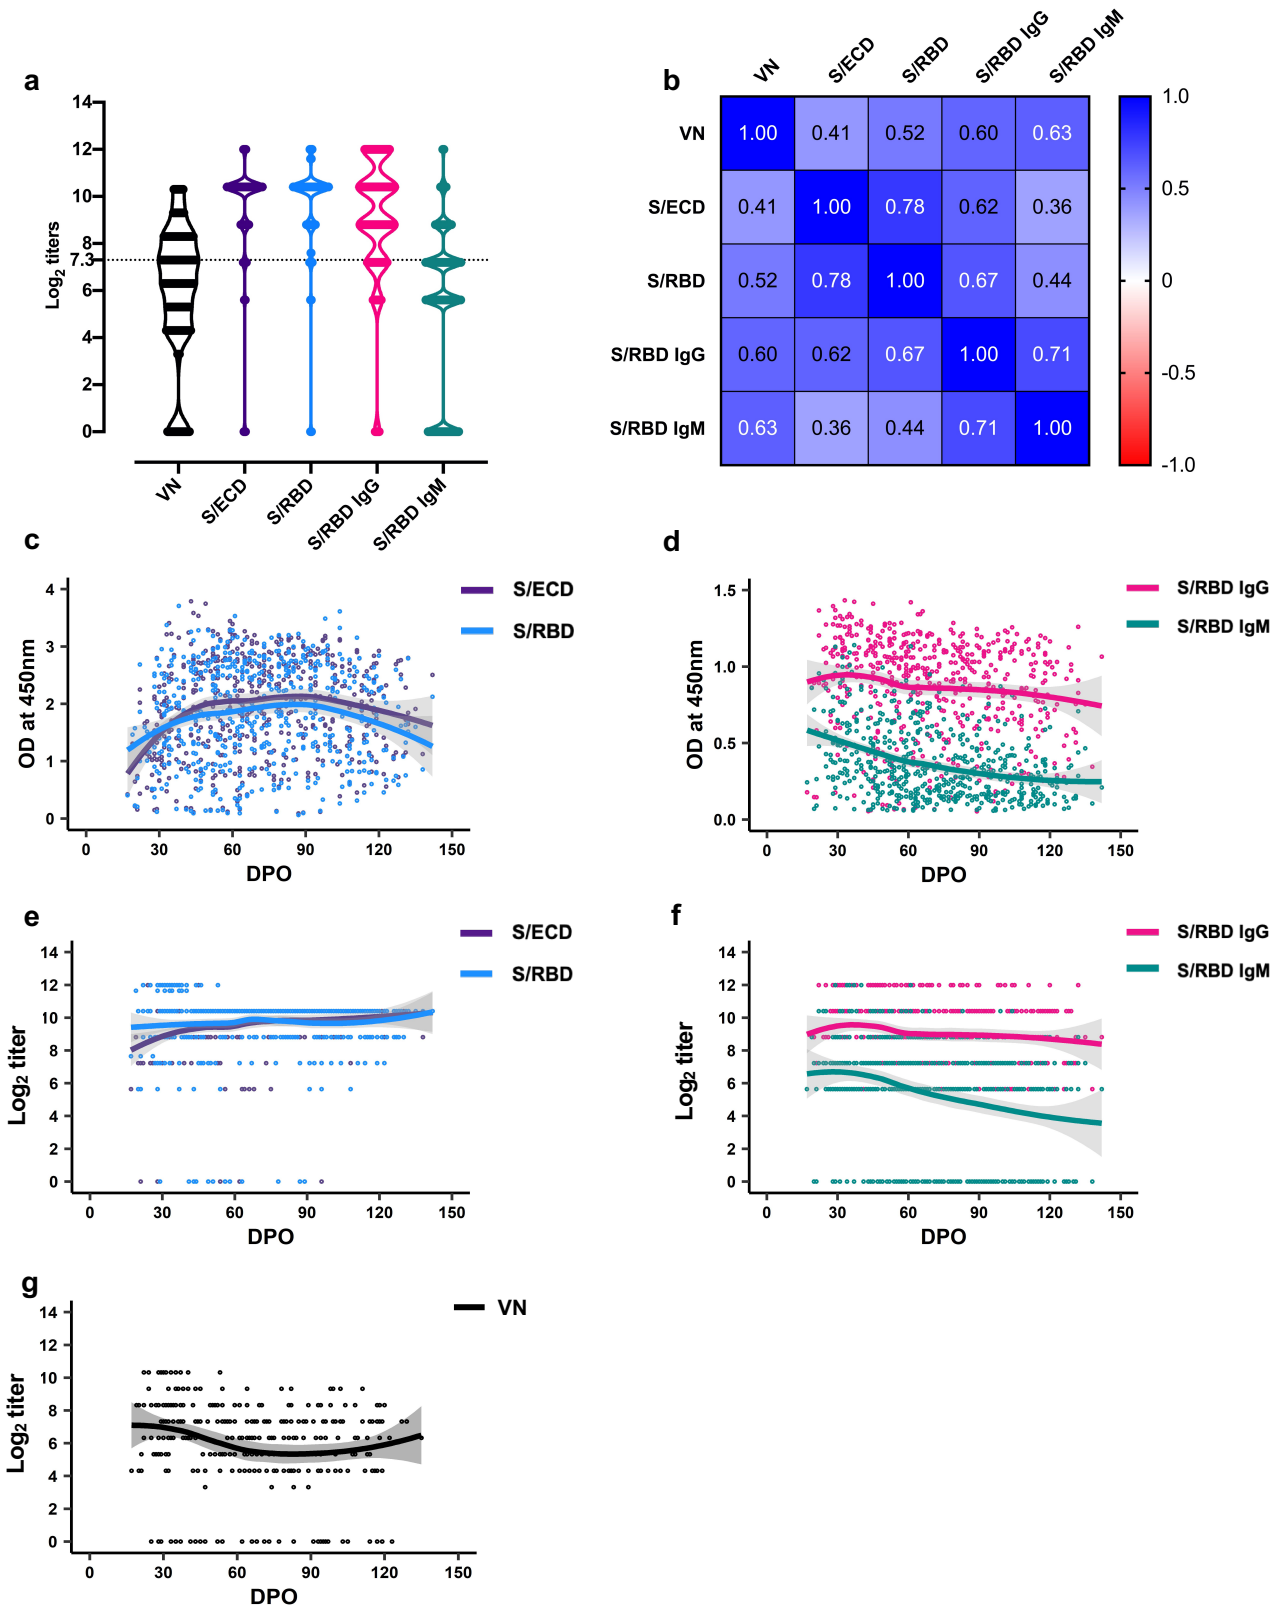

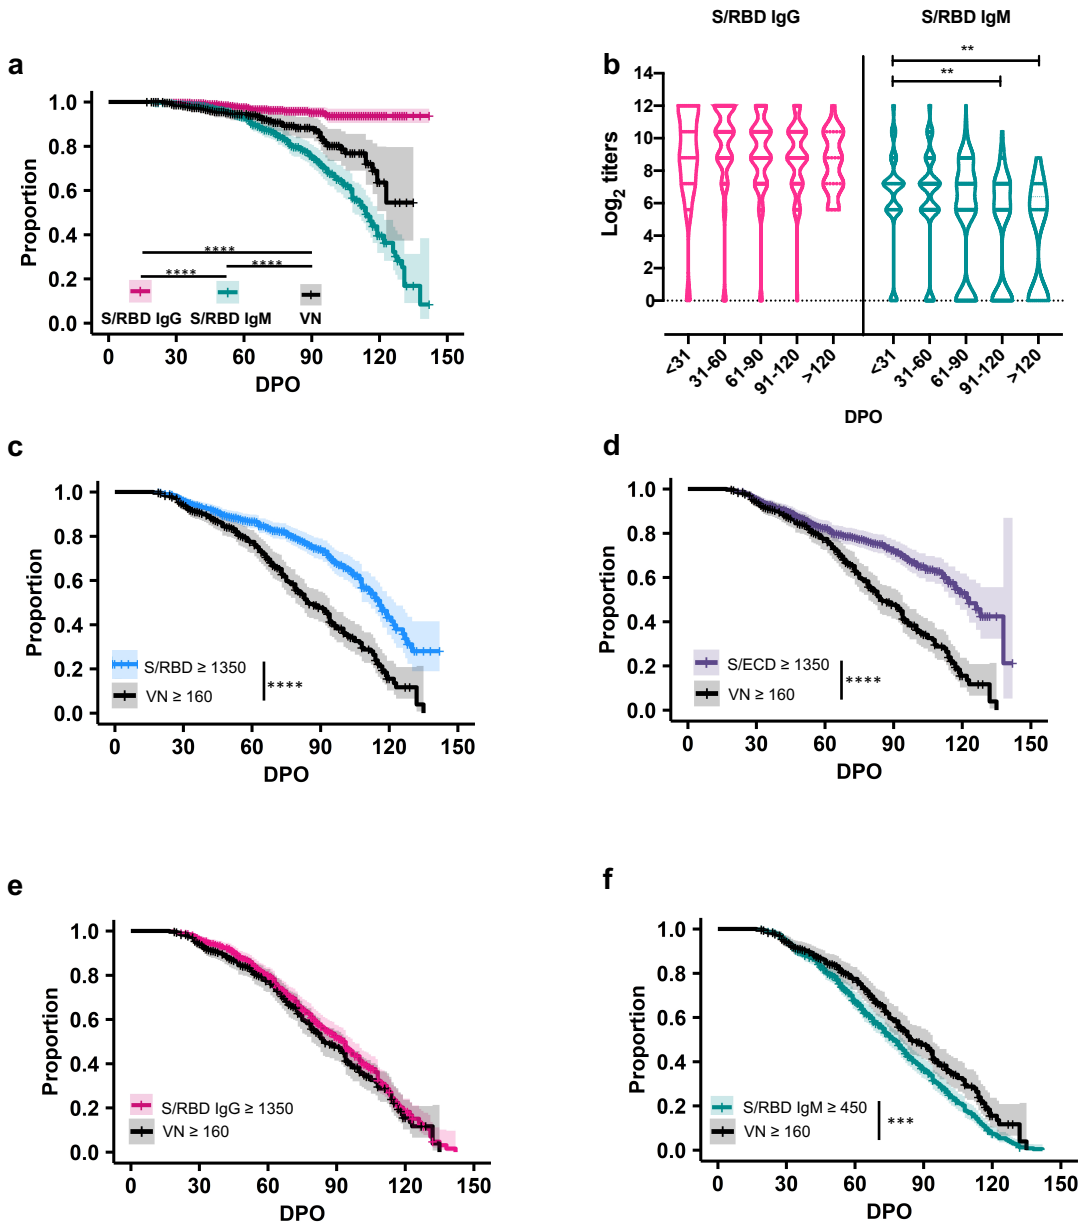

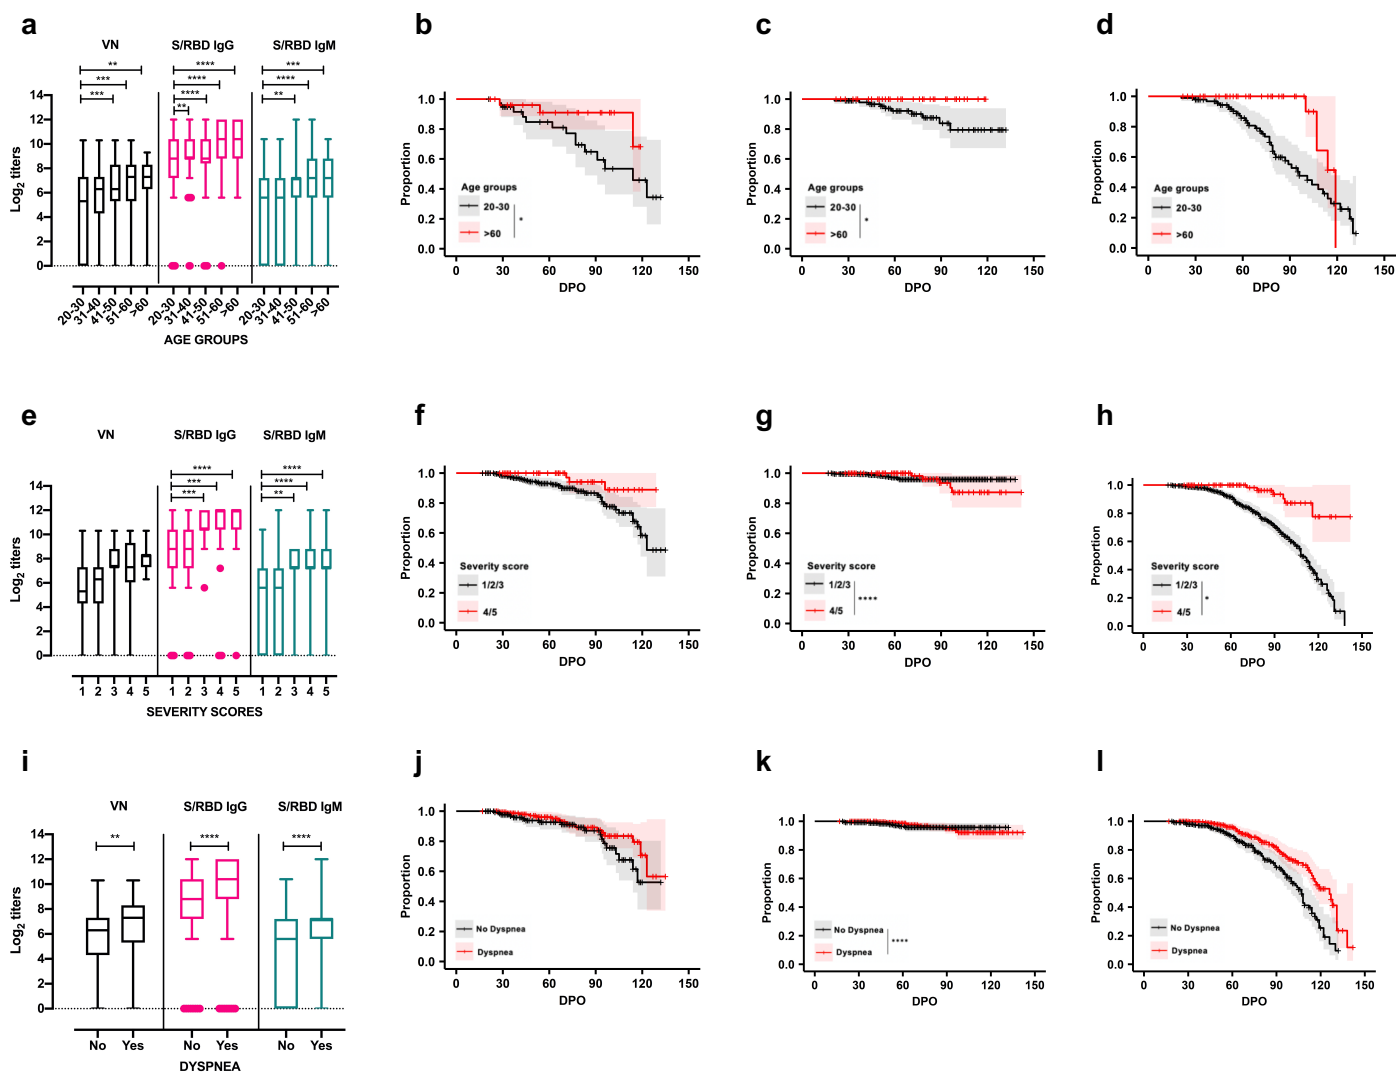

### a: S/RBD IgM

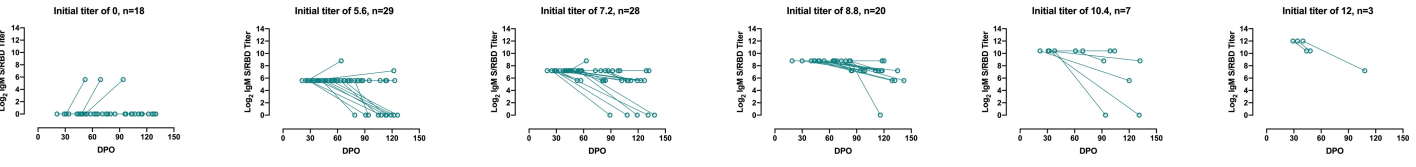

### b: S/RBD IgG

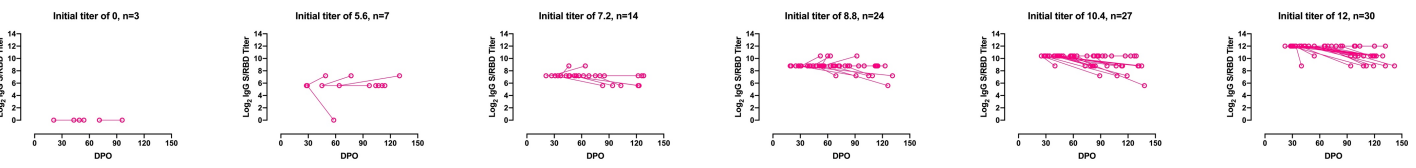

### c: VN

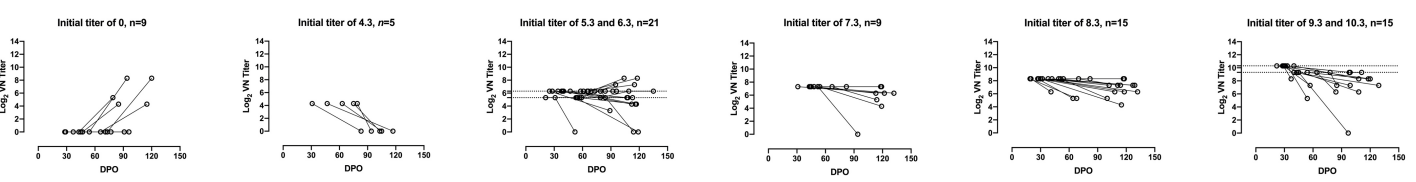



Extended Data Figure 2

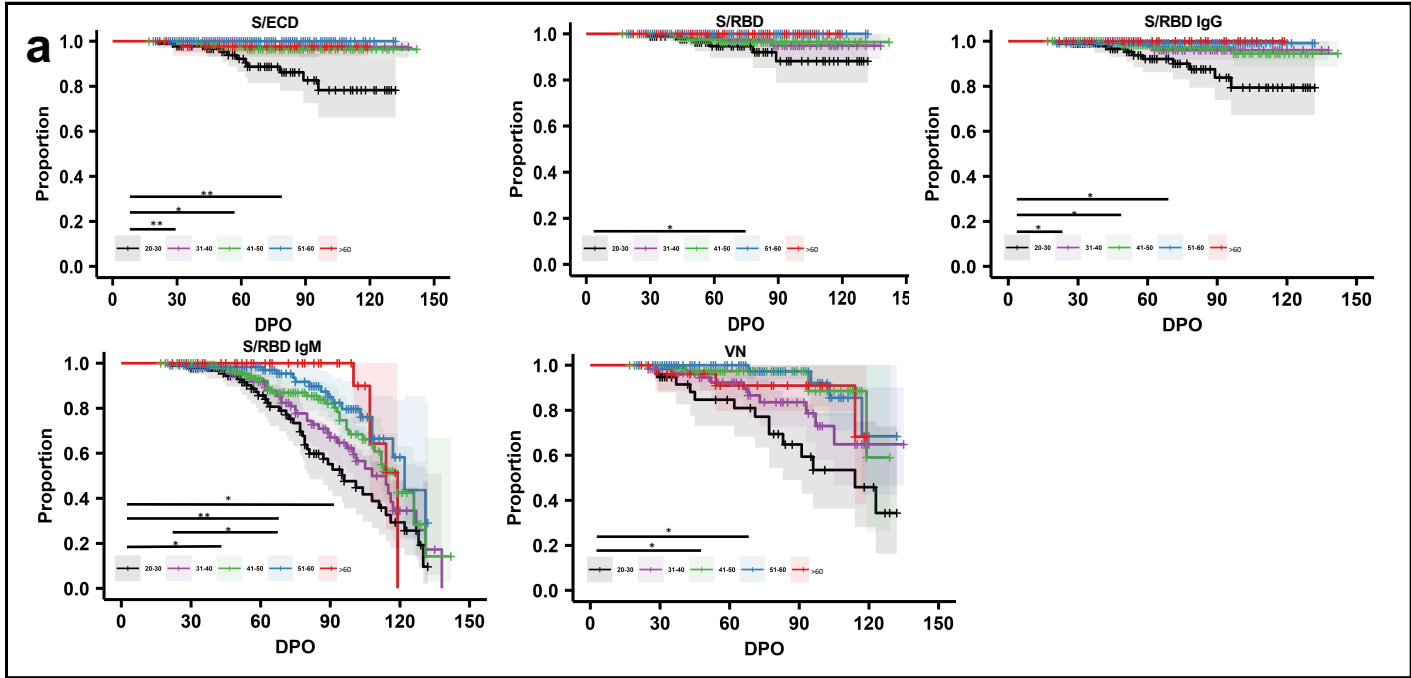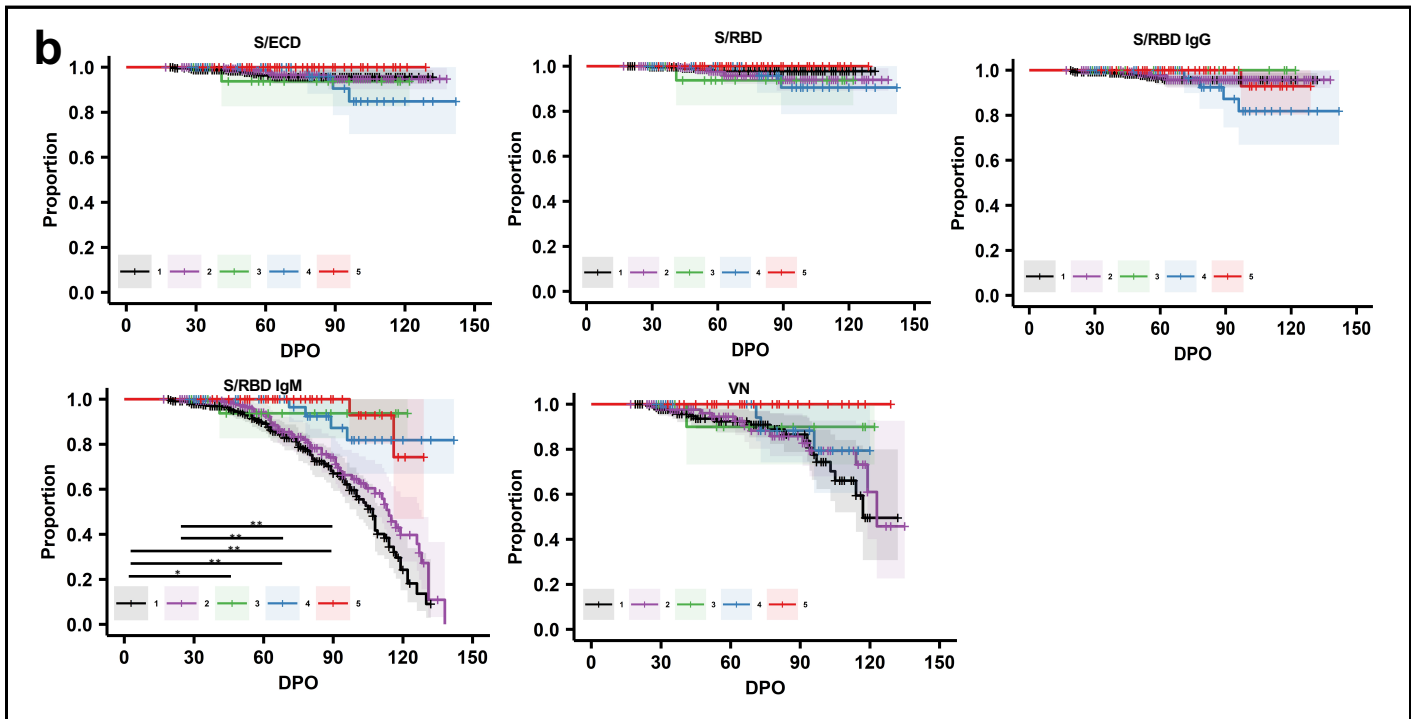

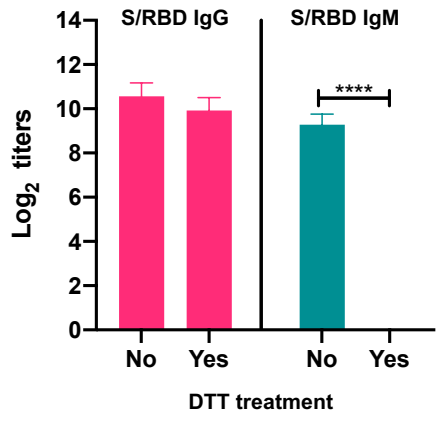

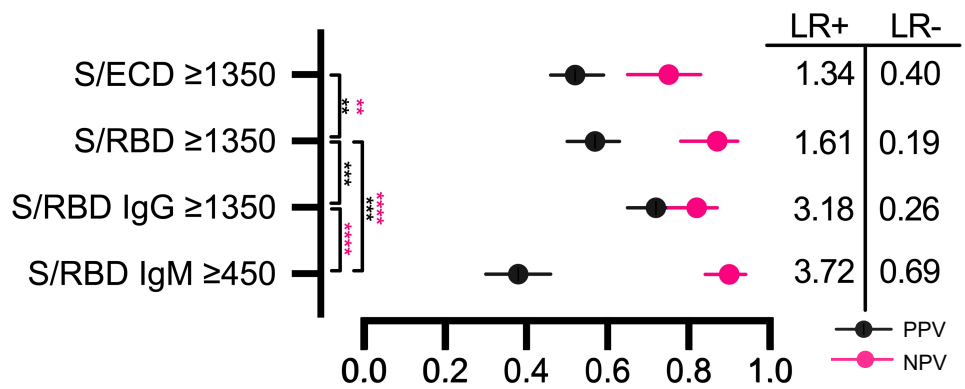

**Table 1:** Demographics and characteristics of the plasma donor cohort.

| <b>Patient characteristics</b> | <b>Samples n (%)</b> | <b>Individuals n (%)</b> |
|--------------------------------|----------------------|--------------------------|
| <b>Sex</b>                     |                      |                          |
| Female                         | 213 (39.4)           | 88 (50.3)                |
| Male                           | 327 (60.6)           | 87 (49.7)                |
| <b>Age</b>                     |                      |                          |
| 20-30                          | 95 (17.6)            | 26 (14.9)                |
| 31-40                          | 117 (21.7)           | 39 (22.3)                |
| 41-50                          | 166 (30.7)           | 51 (29.1)                |
| 51-60                          | 117 (21.7)           | 40 (22.9)                |
| > 60                           | 45 (8.3)             | 19 (10.9)                |
| Average (95% CI)               | 43.8 (42.7 - 44.9)   | 44.9 (43.0 - 46.8)       |
| Median (IQR)                   | 44 (33 - 53)         | 46 (36 - 54)             |
| Range                          | 20 - 78              | 20 - 78                  |
| <b>Severity</b>                |                      |                          |
| 1                              | 244 (45.2)           | 76 (43.4)                |
| 2                              | 182 (33.7)           | 63 (36.0)                |
| 3                              | 23 (4.3)             | 10 (5.7)                 |
| 4                              | 44 (8.1)             | 15 (8.6)                 |
| 5                              | 47 (8.7)             | 11 (6.3)                 |
| Median (IQR)                   | 2 (1 - 2)            | 2 (1 - 2)                |
| Range                          | 1 - 5                | 1 - 5                    |
| <b>Dyspnea</b>                 |                      |                          |
| No                             | 250 (46.3)           | 79 (45.1)                |
| Yes                            | 290 (53.7)           | 96 (54.9)                |
| <b>DPO</b>                     |                      |                          |
| < 31                           | 39 (7.2)             | 35 (20.0)                |
| 31-60                          | 181 (33.5)           | 89 (50.9)                |
| 61-90                          | 173 (32.0)           | 44 (25.1)                |
| 91-120                         | 122 (22.6)           | 7 (4.0)                  |
| > 120                          | 25 (4.6)             | -                        |
| Average (95% CI)               | 70.8 (68.4 - 73.3)   | 49.5 (46.5 - 52.5)       |
| Median (IQR)                   | 68 (48 - 93)         | 46 (32 - 63)             |
| Range                          | 17 - 142             | 17 - 108                 |
| <b>Hospitalization</b>         |                      |                          |
| No                             | 428 (79.3)           | 141 (80.6)               |
| Yes                            | 112 (20.7)           | 34 (19.4)                |
| <b>Total</b>                   | 540                  | 175                      |

**Supplementary Table 1: Convalescent plasma donor demographics and sample characteristics.**

| Subject | Age | Sex | Hospitalization | Severity | Dyspnea | DPO | VN titer | S/ECD titer | S/RBD titer | S/RBD IgG titer | S/RBD IgM titer |
|---------|-----|-----|-----------------|----------|---------|-----|----------|-------------|-------------|-----------------|-----------------|
| 0001    | 44  | M   | NO              | 1        | NO      | 20  | 320      | 150         | 1350        | 450             | 150             |
| 0001    |     |     |                 |          |         | 24  | 640      | -           | -           | 450             | 150             |
| 0001    |     |     |                 |          |         | 27  | 320      | 150         | 450         | 1350            | 150             |
| 0001    |     |     |                 |          |         | 31  | 320      | 150         | 3200        | 1350            | 450             |
| 0001    |     |     |                 |          |         | 34  | 320      | 150         | 3200        | 450             | 150             |
| 0001    |     |     |                 |          |         | 38  | 160      | 450         | 450         | 450             | 150             |
| 0001    |     |     |                 |          |         | 41  | 80       | 450         | 450         | 450             | 150             |
| 0002    | 54  | M   | NO              | 1        | NO      | 28  | 40       | 50          | 150         | 150             | 50              |
| 0003    | 36  | M   | NO              | 1        | NO      | 25  | 80       | 450         | 1350        | 1350            | 150             |
| 0003    |     |     |                 |          |         | 28  | 80       | 150         | 450         | 450             | 0               |
| 0003    |     |     |                 |          |         | 33  | 80       | 450         | 3200        | 1350            | 50              |
| 0003    |     |     |                 |          |         | 35  | 0        | 450         | 450         | 1350            | 50              |
| 0003    |     |     |                 |          |         | 42  | 20       | 150         | 450         | 1350            | 50              |
| 0003    |     |     |                 |          |         | 47  | 10       | 1350        | 1350        | 450             | 50              |
| 0003    |     |     |                 |          |         | 61  | 20       | 1350        | 1350        | 450             | 50              |
| 0003    |     |     |                 |          |         | 68  | 0        | 450         | 1350        | 150             | 0               |
| 0003    |     |     |                 |          |         | 75  | 40       | 1350        | 450         | 450             | 0               |
| 0003    |     |     |                 |          |         | 82  | 20       | 1350        | 450         | 150             | 0               |
| 0003    |     |     |                 |          |         | 89  | 10       | 1350        | 1350        | 150             | 0               |
| 0004    | 54  | F   | NO              | 2        | YES     | 32  | 320      | 1350        | 1350        | 1350            | 1350            |
| 0004    |     |     |                 |          |         | 36  | 640      | 1350        | 1350        | 4050            | 1350            |
| 0004    |     |     |                 |          |         | 68  | 0        | 1350        | 1350        | 1350            | 150             |
| 0004    |     |     |                 |          |         | 75  | 80       | 1350        | 1350        | 1350            | 450             |
| 0004    |     |     |                 |          |         | 103 | 160      | 1350        | 1350        | 1350            | 150             |
| 0004    |     |     |                 |          |         | 118 | 80       | 1350        | 1350        | 1350            | 150             |
| 0004    |     |     |                 |          |         | 131 | -        | 1350        | 1350        | 450             | 0               |
| 0005    | 58  | M   | NO              | 2        | YES     | 91  | -        | 150         | 150         | 150             | 0               |
| 0007    | 36  | M   | NO              | 1        | NO      | 88  | -        | 1350        | 1350        | 1350            | 50              |
| 0007    |     |     |                 |          |         | 123 | -        | 1350        | 1350        | 1350            | 50              |
| 0009    | 38  | F   | NO              | 2        | YES     | 30  | 80       | 450         | 450         | 450             | 50              |
| 0011    | 67  | F   | NO              | 1        | NO      | 28  | 0        | 0           | 50          | 50              | 50              |
| 0011    |     |     |                 |          |         | 49  | -        | 450         | 150         | 150             | 50              |
| 0012    | 46  | F   | NO              | 1        | NO      | 30  | 320      | 150         | 450         | 150             | 150             |
| 0013    | 43  | F   | NO              | 1        | NO      | 28  | 320      | 1350        | 3200        | 4050            | 450             |
| 0016    | 47  | F   | NO              | 1        | NO      | 32  | 640      | 4050        | 4050        | 4050            | 1350            |
| 0020    | 41  | F   | NO              | 2        | YES     | 17  | 20       | 50          | 200         | 50              | 50              |
| 0022    | 22  | M   | NO              | 1        | NO      | 47  | -        | 450         | 150         | 150             | 50              |
| 0022    |     |     |                 |          |         | 57  | -        | 450         | 1350        | 150             | 50              |
| 0028    | 23  | M   | NO              | 1        | NO      | 31  | 20       | 150         | 150         | 150             | 50              |
| 0028    |     |     |                 |          |         | 46  | -        | 450         | 150         | 150             | 50              |

|             |    |   |     |   |     |     |      |      |      |      |      |
|-------------|----|---|-----|---|-----|-----|------|------|------|------|------|
| <b>0028</b> |    |   |     |   |     | 63  | -    | 0    | 450  | 150  | 150  |
| <b>0028</b> |    |   |     |   |     | 77  | -    | 150  | 150  | 150  | 50   |
| <b>0028</b> |    |   |     |   |     | 83  | 0    | 450  | 450  | 50   | 50   |
| <b>0029</b> | 66 | F | NO  | 1 | NO  | 22  | 80   | 150  | 450  | 4050 | 150  |
| <b>0032</b> | 65 | M | NO  | 2 | YES | 25  | 320  | 450  | 4050 | 4050 | 1350 |
| <b>0035</b> | 50 | M | NO  | 2 | YES | 28  | 320  | 1350 | 3200 | 4050 | 150  |
| <b>0035</b> |    |   |     |   |     | 38  | 640  | 1350 | 1350 | 4050 | 150  |
| <b>0035</b> |    |   |     |   |     | 52  | -    | 1350 | 1350 | 4050 | 150  |
| <b>0035</b> |    |   |     |   |     | 59  | 160  | 1350 | 1350 | 1350 | 50   |
| <b>0035</b> |    |   |     |   |     | 82  | 640  | 1350 | 1350 | 1350 | 50   |
| <b>0035</b> |    |   |     |   |     | 108 | 80   | 1350 | 1350 | 450  | 0    |
| <b>0040</b> | 52 | M | NO  | 2 | YES | 29  | 1280 | -    | -    | 4050 | 4050 |
| <b>0040</b> |    |   |     |   |     | 35  | 320  | 4050 | 4050 | 4050 | 4050 |
| <b>0040</b> |    |   |     |   |     | 37  | 320  | 1350 | 4050 | 4050 | 4050 |
| <b>0040</b> |    |   |     |   |     | 44  | -    | 4050 | 4050 | 4050 | 1350 |
| <b>0045</b> | 23 | F | NO  | 1 | NO  | 33  | 1280 | 4050 | 1350 | 4050 | 50   |
| <b>0045</b> |    |   |     |   |     | 47  | -    | 1350 | 1350 | 4050 | 150  |
| <b>0045</b> |    |   |     |   |     | 54  | 40   | 1350 | 1350 | 1350 | 50   |
| <b>0049</b> | 57 | F | NO  | 1 | NO  | 27  | 320  | 150  | 450  | 150  | 50   |
| <b>0049</b> |    |   |     |   |     | 64  | 40   | 1350 | 1350 | 450  | 450  |
| <b>0050</b> | 41 | M | NO  | 2 | YES | 30  | 320  | 1350 | 1350 | 450  | 150  |
| <b>0050</b> |    |   |     |   |     | 33  | 0    | 150  | 150  | 1350 | 50   |
| <b>0050</b> |    |   |     |   |     | 44  | 20   | 1350 | 450  | 450  | 150  |
| <b>0050</b> |    |   |     |   |     | 58  | 20   | 1350 | 1350 | 150  | 50   |
| <b>0050</b> |    |   |     |   |     | 66  | 40   | 1350 | 450  | 150  | 50   |
| <b>0050</b> |    |   |     |   |     | 72  | 20   | 1350 | 1350 | 150  | 50   |
| <b>0050</b> |    |   |     |   |     | 94  | 20   | 1350 | 1350 | 150  | 50   |
| <b>0050</b> |    |   |     |   |     | 102 | 20   | 1350 | 1350 | 150  | 50   |
| <b>0050</b> |    |   |     |   |     | 108 | -    | 1350 | 450  | 450  | 50   |
| <b>0050</b> |    |   |     |   |     | 115 | 20   | 1350 | 450  | 150  | 50   |
| <b>0050</b> |    |   |     |   |     | 131 | -    | 1350 | 1350 | 150  | 0    |
| <b>0051</b> | 50 | F | NO  | 1 | NO  | 30  | 160  | 150  | 450  | 150  | 150  |
| <b>0052</b> | 27 | F | YES | 3 | YES | 31  | 160  | 1350 | 1350 | 4050 | 50   |
| <b>0052</b> |    |   |     |   |     | 59  | -    | 1350 | 1350 | 1350 | 150  |
| <b>0052</b> |    |   |     |   |     | 87  | 160  | 1350 | 1350 | 1350 | 150  |
| <b>0052</b> |    |   |     |   |     | 122 | 80   | 1350 | 1350 | 1350 | 150  |
| <b>0053</b> | 29 | M | NO  | 2 | YES | 28  | 0    | 450  | 450  | 450  | 50   |
| <b>0053</b> | 30 | M | NO  | 2 | YES | 56  | -    | 450  | 450  | 450  | 0    |
| <b>0053</b> |    |   |     |   |     | 63  | -    | 450  | 450  | 150  | 0    |
| <b>0053</b> |    |   |     |   |     | 77  | 0    | 1350 | 1350 | 150  | 0    |
| <b>0053</b> |    |   |     |   |     | 91  | 0    | 150  | 50   | 150  | 0    |
| <b>0055</b> | 61 | M | YES | 3 | YES | 33  | 320  | 1350 | 3200 | 1350 | 150  |
| <b>0057</b> | 44 | F | NO  | 2 | YES | 34  | 160  | 450  | 450  | 450  | 150  |

|      |    |   |    |   |     |     |      |      |      |      |      |
|------|----|---|----|---|-----|-----|------|------|------|------|------|
| 0058 | 36 | M | NO | 2 | YES | 92  | -    | 1350 | 1350 | 1350 | 50   |
| 0062 | 24 | F | NO | 1 | NO  | 32  | 320  | 1350 | 1350 | 1350 | 1350 |
| 0062 |    |   |    |   |     | 35  | 1280 | 1350 | 1350 | 1350 | 1350 |
| 0062 |    |   |    |   |     | 46  | -    | 1350 | 1350 | 1350 | 1350 |
| 0062 |    |   |    |   |     | 53  | -    | 1350 | 1350 | 1350 | 1350 |
| 0062 |    |   |    |   |     | 62  | -    | 1350 | 1350 | 1350 | 450  |
| 0062 |    |   |    |   |     | 69  | 320  | 1350 | 1350 | 1350 | 450  |
| 0062 |    |   |    |   |     | 101 | 80   | 1350 | 1350 | 450  | 450  |
| 0062 |    |   |    |   |     | 118 | 160  | 1350 | 1350 | 450  | 450  |
| 0062 |    |   |    |   |     | 132 | 80   | 1350 | 1350 | 450  | 450  |
| 0065 | 50 | M | NO | 1 | NO  | 34  | -    | 1350 | 1350 | 150  | 0    |
| 0065 |    |   |    |   |     | 54  | -    | 1350 | 1350 | 450  | 150  |
| 0065 |    |   |    |   |     | 126 | -    | 450  | 450  | 150  | 0    |
| 0069 | 49 | F | NO | 1 | NO  | 28  | 80   | 450  | 450  | 1350 | 50   |
| 0069 |    |   |    |   |     | 32  | 80   | 450  | 450  | 1350 | 50   |
| 0069 |    |   |    |   |     | 63  | -    | 50   | 450  | 450  | 0    |
| 0069 |    |   |    |   |     | 108 | 40   | 1350 | 450  | 150  | 0    |
| 0070 | 37 | F | NO | 2 | YES | 38  | 160  | 450  | 1350 | 4050 | 50   |
| 0072 | 23 | F | NO | 1 | NO  | 29  | 0    | 0    | 0    | 50   | 0    |
| 0072 |    |   |    |   |     | 37  | 0    | 50   | 50   | 0    | 0    |
| 0072 |    |   |    |   |     | 44  | -    | 0    | 0    | 0    | 0    |
| 0072 |    |   |    |   |     | 51  | -    | 0    | 0    | 0    | 0    |
| 0072 |    |   |    |   |     | 58  | -    | 0    | 0    | 0    | 0    |
| 0073 | 39 | F | NO | 2 | YES | 47  | 0    | 150  | 150  | 150  | 0    |
| 0073 |    |   |    |   |     | 55  | -    | 450  | 450  | 150  | 0    |
| 0073 |    |   |    |   |     | 85  | 20   | 1350 | 450  | 150  | 0    |
| 0077 | 59 | F | NO | 1 | NO  | 71  | -    | 1350 | 1350 | 1350 | 150  |
| 0081 | 64 | F | NO | 2 | YES | 52  | -    | 450  | 1350 | 1350 | 150  |
| 0088 | 29 | F | NO | 1 | NO  | 21  | 20   | 0    | 50   | 0    | 0    |
| 0088 |    |   |    |   |     | 54  | -    | 0    | 50   | 0    | 0    |
| 0089 | 42 | F | NO | 2 | YES | 38  | 160  | 450  | 450  | 4050 | 150  |
| 0090 | 33 | M | NO | 1 | NO  | 37  | 1280 | 150  | 150  | 150  | 50   |
| 0090 |    |   |    |   |     | 46  | -    | 1350 | 1350 | 450  | 50   |
| 0095 | 61 | F | NO | 1 | NO  | 54  | 160  | 1350 | 1350 | 4050 | 150  |
| 0095 |    |   |    |   |     | 76  | -    | 1350 | 1350 | 1350 | 50   |
| 0095 |    |   |    |   |     | 83  | -    | 1350 | 1350 | 1350 | 50   |
| 0095 |    |   |    |   |     | 119 | 20   | 1350 | 1350 | 450  | 0    |
| 0096 | 44 | F | NO | 1 | NO  | 59  | -    | 1350 | 1350 | 1350 | 50   |
| 0099 | 54 | F | NO | 1 | NO  | 20  | 20   | 50   | 50   | 0    | 0    |
| 0109 | 33 | F | NO | 1 | NO  | 67  | 160  | 1350 | 1350 | 450  | 50   |
| 0109 |    |   |    |   |     | 73  |      | 1350 | 1350 | 450  | 50   |
| 0109 |    |   |    |   |     | 80  | 160  | 1350 | 1350 | 450  | 0    |
| 0109 |    |   |    |   |     | 93  | 0    | 450  | 150  | 450  | 0    |

|             |    |   |     |   |     |     |      |      |      |      |      |
|-------------|----|---|-----|---|-----|-----|------|------|------|------|------|
| <b>0109</b> |    |   |     |   |     | 100 | -    | 450  | 450  | 450  | 0    |
| <b>0109</b> |    |   |     |   |     | 108 | -    | 1350 | 450  | 450  | 0    |
| <b>0109</b> |    |   |     |   |     | 114 | 40   | 1350 | 450  | 450  | 0    |
| <b>0112</b> | 47 | F | NO  | 1 | NO  | 32  | 40   | 450  | 450  | 450  | 150  |
| <b>0113</b> | 52 | F | NO  | 1 | NO  | 29  | 40   | 1350 | 150  | 150  | 0    |
| <b>0115</b> | 70 | M | YES | 5 | NO  | 54  | 320  | 1350 | 1350 | 4050 | 450  |
| <b>0115</b> |    |   |     |   |     | 62  | -    | 1350 | 1350 | 4050 | 150  |
| <b>0115</b> |    |   |     |   |     | 102 | 640  | 1350 | 1350 | 1350 | 150  |
| <b>0115</b> |    |   |     |   |     | 118 | 320  | 1350 | 1350 | 1350 | 150  |
| <b>0116</b> | 27 | M | NO  | 1 | NO  | 32  | 20   | 450  | 450  | 450  | 50   |
| <b>0117</b> | 27 | F | NO  | 2 | YES | 30  | 320  | 1350 | 1350 | 1350 | 150  |
| <b>0117</b> |    |   |     |   |     | 44  | -    | 1350 | 1350 | 1350 | 150  |
| <b>0117</b> |    |   |     |   |     | 71  | -    | 1350 | 1350 | 1350 | 150  |
| <b>0117</b> |    |   |     |   |     | 79  | 160  | 1350 | 1350 | 1350 | 150  |
| <b>0117</b> |    |   |     |   |     | 85  | -    | 1350 | 1350 | 1350 | 150  |
| <b>0117</b> |    |   |     |   |     | 129 | 160  | 1350 | 1350 | 1350 | 150  |
| <b>0118</b> | 50 | F | NO  | 1 | NO  | 34  | 320  | 1350 | 450  | 4050 | 150  |
| <b>0118</b> |    |   |     |   |     | 40  | -    | 1350 | 1350 | 450  | 150  |
| <b>0119</b> | 35 | F | NO  | 1 | NO  | 25  | 0    | 450  | 450  | 1350 | 50   |
| <b>0119</b> |    |   |     |   |     | 34  | -    | 1350 | 1350 | 450  | 50   |
| <b>0119</b> |    |   |     |   |     | 40  | -    | 1350 | 450  | 450  | 50   |
| <b>0120</b> | 41 | F | NO  | 1 | NO  | 19  | 320  | 450  | 3200 | 450  | 450  |
| <b>0120</b> |    |   |     |   |     | 68  | 40   | 1350 | 1350 | 450  | 450  |
| <b>0121</b> | 51 | F | NO  | 1 | NO  | 21  | 40   | 150  | 200  | 150  | 50   |
| <b>0121</b> |    |   |     |   |     | 54  | 40   | 450  | 450  | 150  | 50   |
| <b>0132</b> | 61 | M | YES | 5 | YES | 78  | 640  | 1350 | 1350 | 4050 | 450  |
| <b>0132</b> |    |   |     |   |     | 85  | 160  | 1350 | 1350 | 4050 | 150  |
| <b>0133</b> | 51 | M | NO  | 2 | YES | 25  | -    | 150  | 450  | 450  | 150  |
| <b>0133</b> |    |   |     |   |     | 53  | -    | 1350 | 1350 | 450  | 50   |
| <b>0135</b> | 47 | F | NO  | 2 | YES | 32  | 320  | 4050 | 4050 | 4050 | 150  |
| <b>0137</b> | 53 | F | NO  | 1 | NO  | 38  | 80   | 450  | 3200 | 450  | 50   |
| <b>0137</b> |    |   |     |   |     | 59  | -    | 450  | 1350 | 450  | 50   |
| <b>0137</b> |    |   |     |   |     | 66  | -    | 1350 | 1350 | 450  | 50   |
| <b>0137</b> |    |   |     |   |     | 73  | 80   | 1350 | 1350 | 450  | 50   |
| <b>0140</b> | 54 | M | NO  | 1 | NO  | 98  | -    | 1350 | 1350 | 450  | 50   |
| <b>0143</b> | 49 | F | NO  | 2 | YES | 37  | 160  | 1350 | 3200 | 4050 | 150  |
| <b>0144</b> | 48 | M | YES | 5 | YES | 40  | 640  | 1350 | 3200 | 4050 | 450  |
| <b>0144</b> |    |   |     |   |     | 45  | 640  | 4050 | 1350 | 4050 | 1350 |
| <b>0144</b> |    |   |     |   |     | 50  | 320  | 450  | 1350 | 4050 | 450  |
| <b>0144</b> |    |   |     |   |     | 53  | 1280 | 4050 | 4050 | 1350 | 150  |
| <b>0144</b> |    |   |     |   |     | 64  | 320  | 1350 | 1350 | 1350 | 150  |
| <b>0144</b> |    |   |     |   |     | 73  | 80   | 1350 | 1350 | 1350 | 150  |
| <b>0144</b> |    |   |     |   |     | 80  | 160  | 1350 | 1350 | 1350 | 50   |



|             |    |   |     |   |     |     |      |      |      |      |      |
|-------------|----|---|-----|---|-----|-----|------|------|------|------|------|
| <b>0144</b> |    |   |     |   |     | 94  | 80   | 1350 | 1350 | 1350 | 150  |
| <b>0144</b> |    |   |     |   |     | 115 | 160  | 1350 | 1350 | 1350 | 50   |
| <b>0144</b> |    |   |     |   |     | 121 | -    | 1350 | 450  | 1350 | 50   |
| <b>0144</b> |    |   |     |   |     | 129 | 160  | 1350 | 1350 | 1350 | 50   |
| <b>0156</b> | 59 | M | NO  | 1 | NO  | 22  | 1280 | 4050 | 1350 | 4050 | 1350 |
| <b>0156</b> |    |   |     |   |     | 29  | 1280 | 1350 | 1350 | 4050 | 450  |
| <b>0156</b> |    |   |     |   |     | 43  | 80   | 1350 | 1350 | 4050 | 450  |
| <b>0156</b> |    |   |     |   |     | 50  | -    | 1350 | 1350 | 4050 | 450  |
| <b>0156</b> |    |   |     |   |     | 65  | -    | 1350 | 1350 | 4050 | 150  |
| <b>0156</b> |    |   |     |   |     | 71  | 160  | 1350 | 1350 | 1350 | 150  |
| <b>0156</b> |    |   |     |   |     | 85  | -    | 1350 | 1350 | 1350 | 50   |
| <b>0156</b> |    |   |     |   |     | 92  | -    | 1350 | 1350 | 1350 | 50   |
| <b>0156</b> |    |   |     |   |     | 99  | 160  | 1350 | 1350 | 1350 | 50   |
| <b>0156</b> |    |   |     |   |     | 106 | -    | 1350 | 1350 | 1350 | 50   |
| <b>0156</b> |    |   |     |   |     | 113 | -    | 1350 | 1350 | 1350 | 50   |
| <b>0156</b> |    |   |     |   |     | 120 | 320  | 1350 | 1350 | 1350 | 50   |
| <b>0158</b> | 33 | M | NO  | 2 | YES | 26  | 40   | 150  | 200  | 450  | 50   |
| <b>0159</b> | 23 | F | NO  | 2 | YES | 46  | -    | 4050 | 4050 | 4050 | 450  |
| <b>0162</b> | 51 | F | YES | 3 | YES | 34  | 160  | 150  | 450  | 450  | 50   |
| <b>0177</b> | 55 | M | NO  | 1 | NO  | 44  | 160  | 4050 | 4050 | 4050 | 450  |
| <b>0177</b> |    |   |     |   |     | 132 | 80   | 1350 | 1350 | 450  | 50   |
| <b>0215</b> | 38 | M | NO  | 2 | YES | 53  | -    | 1350 | 1350 | 450  | 50   |
| <b>0215</b> |    |   |     |   |     | 60  | -    | 1350 | 1350 | 1350 | 50   |
| <b>0229</b> | 32 | M | NO  | 2 | YES | 40  | 80   | 450  | 1350 | 1350 | 450  |
| <b>0229</b> |    |   |     |   |     | 61  | 320  | 1350 | 1350 | 1350 | 450  |
| <b>0229</b> |    |   |     |   |     | 68  | -    | 1350 | 1350 | 450  | 150  |
| <b>0229</b> |    |   |     |   |     | 76  | -    | 1350 | 1350 | 450  | 150  |
| <b>0229</b> |    |   |     |   |     | 100 | 160  | 1350 | 1350 | 450  | 150  |
| <b>0229</b> |    |   |     |   |     | 110 | -    | 1350 | 1350 | 450  | 150  |
| <b>0229</b> |    |   |     |   |     | 117 | 160  | 1350 | 1350 | 450  | 50   |
| <b>0229</b> |    |   |     |   |     | 135 | 80   | 1350 | 1350 | 450  | 150  |
| <b>0234</b> | 40 | M | NO  | 2 | YES | 27  | 40   | 150  | 150  | 150  | 150  |
| <b>0245</b> | 51 | M | YES | 5 | YES | 38  | 320  | 1350 | 4050 | 4050 | 150  |
| <b>0245</b> |    |   |     |   |     | 52  | -    | 1350 | 1350 | 4050 | 450  |
| <b>0245</b> |    |   |     |   |     | 59  | -    | 1350 | 1350 | 4050 | 150  |
| <b>0245</b> |    |   |     |   |     | 81  | 320  | 1350 | 1350 | 1350 | 150  |
| <b>0245</b> |    |   |     |   |     | 102 | 160  | 1350 | 1350 | 1350 | 50   |
| <b>0249</b> | 56 | M | NO  | 1 | NO  | 22  | 320  | 4050 | 4050 | 4050 | 150  |
| <b>0255</b> | 40 | M | NO  | 2 | YES | 31  | 40   | 450  | 450  | 450  | 0    |
| <b>0255</b> |    |   |     |   |     | 45  | -    | 1350 | 1350 | 1350 | 50   |
| <b>0255</b> |    |   |     |   |     | 52  | 0    | 1350 | 1350 | 1350 | 50   |
| <b>0260</b> | 44 | M | NO  | 2 | YES | 24  | 1280 | 4050 | 1350 | 1350 | 1350 |
| <b>0262</b> | 36 | F | YES | 4 | YES | 31  | 1280 | 4050 | 4050 | 4050 | 1350 |

|             |    |   |     |   |     |     |     |      |      |      |      |
|-------------|----|---|-----|---|-----|-----|-----|------|------|------|------|
| <b>0262</b> |    |   |     |   |     | 49  | -   | 1350 | 1350 | 4050 | 1350 |
| <b>0262</b> |    |   |     |   |     | 99  | 640 | 1350 | 1350 | 4050 | 1350 |
| <b>0263</b> | 20 | M | NO  | 1 | NO  | 43  | 0   | 1350 | 1350 | 1350 | 50   |
| <b>0263</b> |    |   |     |   |     | 52  | -   | 150  | 1350 | 450  | 50   |
| <b>0263</b> |    |   |     |   |     | 59  | -   | 1350 | 450  | 450  | 0    |
| <b>0263</b> |    |   |     |   |     | 79  | 40  | 1350 | 1350 | 450  | 0    |
| <b>0265</b> | 53 | F | NO  | 2 | YES | 31  | 320 | 4050 | 4050 | 4050 | 150  |
| <b>0280</b> | 37 | M | YES | 4 | YES | 73  | 0   | 1350 | 1350 | 4050 | 450  |
| <b>0280</b> |    |   |     |   |     | 98  | 320 | 1350 | 1350 | 4050 | 450  |
| <b>0280</b> |    |   |     |   |     | 120 | 320 | 1350 | 1350 | 4050 | 450  |
| <b>0284</b> | 35 | F | NO  | 4 | YES | 53  | -   | 1350 | 1350 | 1350 | 150  |
| <b>0285</b> | 51 | F | NO  | 1 | NO  | 40  | -   | 1350 | 1350 | 450  | 150  |
| <b>0285</b> |    |   |     |   |     | 56  | -   | 1350 | 1350 | 450  | 150  |
| <b>0287</b> | 40 | F | NO  | 2 | YES | 56  | -   | 50   | 0    | 0    | 0    |
| <b>0301</b> | 59 | M | NO  | 1 | NO  | 83  | -   | 1350 | 1350 | 1350 | 450  |
| <b>0301</b> |    |   |     |   |     | 90  | -   | 1350 | 1350 | 1350 | 450  |
| <b>0301</b> |    |   |     |   |     | 97  | -   | 1350 | 1350 | 450  | 150  |
| <b>0302</b> | 25 | M | NO  | 1 | NO  | 84  | 80  | 1350 | 1350 | 450  | 150  |
| <b>0302</b> |    |   |     |   |     | 96  | 80  | 450  | 150  | 450  | 50   |
| <b>0302</b> |    |   |     |   |     | 112 | -   | 450  | 1350 | 450  | 50   |
| <b>0313</b> | 78 | M | YES | 3 | YES | 36  | 160 | 4050 | 4050 | 4050 | 50   |
| <b>0339</b> | 31 | M | YES | 3 | YES | 54  | 640 | 150  | 1350 | 4050 | 450  |
| <b>0339</b> |    |   |     |   |     | 62  | -   | 1350 | 1350 | 4050 | 450  |
| <b>0339</b> |    |   |     |   |     | 68  | 160 | 1350 | 1350 | 4050 | 450  |
| <b>0339</b> |    |   |     |   |     | 82  | -   | 1350 | 1350 | 1350 | 150  |
| <b>0339</b> |    |   |     |   |     | 89  | -   | 1350 | 1350 | 1350 | 150  |
| <b>0339</b> |    |   |     |   |     | 96  | 160 | 1350 | 1350 | 1350 | 150  |
| <b>0339</b> |    |   |     |   |     | 110 | -   | 1350 | 1350 | 1350 | 150  |
| <b>0339</b> |    |   |     |   |     | 118 | 320 | 1350 | 1350 | 1350 | 150  |
| <b>0345</b> | 62 | M | NO  | 1 | NO  | 54  | 0   | 1350 | 1350 | 4050 | 450  |
| <b>0345</b> |    |   |     |   |     | 94  | 320 | 1350 | 1350 | 1350 | 150  |
| <b>0350</b> | 53 | M | NO  | 1 | NO  | 45  | 160 | 1350 | 1350 | 1350 | 150  |
| <b>0350</b> |    |   |     |   |     | 59  | -   | 1350 | 1350 | 1350 | 150  |
| <b>0350</b> |    |   |     |   |     | 82  | 160 | 1350 | 1350 | 450  | 50   |
| <b>0354</b> | 59 | M | YES | 4 | YES | 98  | 640 | 1350 | 1350 | 4050 | 150  |
| <b>0354</b> |    |   |     |   |     | 104 | -   | 1350 | 1350 | 4050 | 150  |
| <b>0354</b> |    |   |     |   |     | 111 | 640 | 1350 | 1350 | 4050 | 450  |
| <b>0354</b> |    |   |     |   |     | 132 | -   | 1350 | 1350 | 4050 | 150  |
| <b>0363</b> | 56 | M | NO  | 1 | NO  | 34  | 80  | 450  | 1350 | 1350 | 50   |
| <b>0363</b> |    |   |     |   |     | 44  | -   | 1350 | 1350 | 1350 | 50   |
| <b>0363</b> |    |   |     |   |     | 59  | -   | 1350 | 1350 | 450  | 50   |
| <b>0363</b> |    |   |     |   |     | 64  | -   | 1350 | 1350 | 450  | 50   |
| <b>0363</b> |    |   |     |   |     | 73  | 80  | 1350 | 1350 | 450  | 50   |

|             |    |   |     |   |     |     |      |      |      |      |     |
|-------------|----|---|-----|---|-----|-----|------|------|------|------|-----|
| <b>0363</b> |    |   |     |   |     | 86  | -    | 450  | 1350 | 450  | 0   |
| <b>0363</b> |    |   |     |   |     | 100 | 20   | 1350 | 1350 | 450  | 50  |
| <b>0363</b> |    |   |     |   |     | 107 | 40   | 1350 | 450  | 450  | 50  |
| <b>0367</b> | 58 | F | NO  | 2 | YES | 89  | -    | 1350 | 1350 | 4050 | 450 |
| <b>0368</b> | 37 | F | NO  | 2 | YES | 29  | 160  | 450  | 1350 | 4050 | 50  |
| <b>0369</b> | 41 | M | NO  | 1 | NO  | 39  | 80   | 150  | 450  | 1350 | 50  |
| <b>0369</b> |    |   |     |   |     | 46  | 40   | 450  | 450  | 450  | 50  |
| <b>0369</b> |    |   |     |   |     | 49  | 40   | 1350 | 1350 | 450  | 50  |
| <b>0369</b> |    |   |     |   |     | 56  | 80   | 1350 | 1350 | 450  | 50  |
| <b>0369</b> |    |   |     |   |     | 63  | 20   | 1350 | 1350 | 450  | 0   |
| <b>0369</b> |    |   |     |   |     | 69  | 20   | 1350 | 450  | 450  | 50  |
| <b>0369</b> |    |   |     |   |     | 76  | 20   | 1350 | 450  | 150  | 50  |
| <b>0369</b> |    |   |     |   |     | 83  | 10   | 1350 | 1350 | 150  | 50  |
| <b>0369</b> |    |   |     |   |     | 97  | 20   | 450  | 450  | 450  | 0   |
| <b>0369</b> |    |   |     |   |     | 104 | -    | 450  | 150  | 150  | 0   |
| <b>0369</b> |    |   |     |   |     | 112 | 20   | 1350 | 450  | 150  | 0   |
| <b>0369</b> | 41 | M | NO  | 1 | NO  | 119 | -    | 450  | 450  | 150  | 0   |
| <b>0376</b> | 52 | M | YES | 4 | YES | 28  | 1280 | 1350 | 4050 | 4050 | 150 |
| <b>0376</b> |    |   |     |   |     | 32  | 160  | 4050 | 4050 | 4050 | 150 |
| <b>0376</b> |    |   |     |   |     | 60  | -    | 1350 | 1350 | 1350 | 150 |
| <b>0376</b> |    |   |     |   |     | 67  | 80   | 1350 | 1350 | 1350 | 50  |
| <b>0376</b> |    |   |     |   |     | 88  | 160  | 1350 | 1350 | 1350 | 50  |
| <b>0376</b> |    |   |     |   |     | 108 | 80   | 1350 | 1350 | 450  | 50  |
| <b>0377</b> | 49 | M | NO  | 2 | YES | 52  | 160  | 450  | 1350 | 150  | 0   |
| <b>0377</b> |    |   |     |   |     | 66  | -    | 50   | 450  | 150  | 0   |
| <b>0377</b> |    |   |     |   |     | 80  | -    | 450  | 450  | 50   | 0   |
| <b>0377</b> |    |   |     |   |     | 94  | 0    | 450  | 450  | 50   | 50  |
| <b>0385</b> | 45 | M | NO  | 2 | YES | 63  | -    | 0    | 0    | 0    | 0   |
| <b>0398</b> | 55 | F | YES | 4 | YES | 58  | -    | 1350 | 1350 | 1350 | 150 |
| <b>0398</b> |    |   |     |   |     | 67  | -    | 1350 | 1350 | 1350 | 150 |
| <b>0398</b> |    |   |     |   |     | 73  | -    | 1350 | 1350 | 450  | 150 |
| <b>0412</b> | 53 | M | NO  | 1 | NO  | 75  | 20   | 1350 | 450  | 150  | 0   |
| <b>0412</b> |    |   |     |   |     | 89  | -    | 1350 | 1350 | 150  | 0   |
| <b>0412</b> |    |   |     |   |     | 103 | 0    | 1350 | 450  | 50   | 0   |
| <b>0419</b> | 40 | M | NO  | 2 | YES | 68  | --   | 1350 | 1350 | 1350 | 150 |
| <b>0422</b> | 41 | M | NO  | 1 | NO  | 64  | 640  | 1350 | 1350 | 1350 | 450 |
| <b>0422</b> |    |   |     |   |     | 84  | 80   | 1350 | 450  | 450  | 150 |
| <b>0423</b> | 39 | M | NO  | 2 | YES | 57  | 40   | 450  | 1350 | 1350 | 150 |
| <b>0423</b> |    |   |     |   |     | 65  | 20   | 1350 | 1350 | 450  | 50  |
| <b>0423</b> |    |   |     |   |     | 75  | 20   | 50   | 1350 | 450  | 50  |
| <b>0423</b> |    |   |     |   |     | 83  | 20   | 1350 | 1350 | 450  | 50  |
| <b>0423</b> |    |   |     |   |     | 89  | 20   | 450  | 1350 | 150  | 50  |
| <b>0423</b> |    |   |     |   |     | 117 | 20   | 450  | 450  | 150  | 0   |

|             |    |   |     |   |     |     |      |      |      |      |      |
|-------------|----|---|-----|---|-----|-----|------|------|------|------|------|
| <b>0423</b> |    |   |     |   |     | 127 | -    | 1350 | 450  | 150  | 0    |
| <b>0423</b> |    |   |     |   |     | 131 | -    | 1350 | 1350 | 150  | 0    |
| <b>0423</b> |    |   |     |   |     | 138 | -    | 450  | 1350 | 50   | 0    |
| <b>0430</b> | 44 | M | YES | 4 | YES | 35  | 1280 | 4050 | 4050 | 4050 | 150  |
| <b>0436</b> | 32 | F | NO  | 1 | NO  | 45  | 640  | 1350 | 1350 | 50   | 0    |
| <b>0436</b> |    |   |     |   |     | 55  | -    | 1350 | 1350 | 50   | 0    |
| <b>0436</b> |    |   |     |   |     | 62  | -    | 450  | 1350 | 50   | 0    |
| <b>0436</b> |    |   |     |   |     | 69  | -    | 1350 | 1350 | 50   | 0    |
| <b>0436</b> |    |   |     |   |     | 90  | -    | 1350 | 1350 | 50   | 0    |
| <b>0436</b> |    |   |     |   |     | 97  | 0    | 1350 | 1350 | 50   | 0    |
| <b>0437</b> | 49 | M | NO  | 1 | NO  | 55  | 40   | 1350 | 1350 | 450  | 50   |
| <b>0437</b> |    |   |     |   |     | 64  | -    | 1350 | 1350 | 450  | 50   |
| <b>0437</b> |    |   |     |   |     | 78  | -    | 1350 | 1350 | 450  | 50   |
| <b>0437</b> |    |   |     |   |     | 113 | 40   | 1350 | 1350 | 450  | 50   |
| <b>0448</b> | 49 | M | NO  | 2 | YES | 43  | 160  | 1350 | 1350 | 4050 | 150  |
| <b>0448</b> |    |   |     |   |     | 46  | -    | 1350 | 1350 | 4050 | 150  |
| <b>0448</b> |    |   |     |   |     | 91  | 160  | 1350 | 1350 | 1350 | 150  |
| <b>0448</b> |    |   |     |   |     | 105 | -    | 1350 | 1350 | 4050 | 150  |
| <b>0448</b> |    |   |     |   |     | 112 | -    | 1350 | 1350 | 1350 | 50   |
| <b>0448</b> |    |   |     |   |     | 119 | 160  | 1350 | 1350 | 1350 | 50   |
| <b>0462</b> | 47 | F | NO  | 2 | YES | 61  | -    | 450  | 1350 | 450  | 0    |
| <b>0464</b> | 31 | F | NO  | 2 | YES | 48  | 160  | 1350 | 1350 | 4050 | 450  |
| <b>0464</b> |    |   |     |   |     | 55  | 160  | 1350 | 1350 | 4050 | 450  |
| <b>0464</b> |    |   |     |   |     | 62  | 80   | 1350 | 1350 | 450  | 450  |
| <b>0464</b> |    |   |     |   |     | 69  | 80   | 1350 | 1350 | 1350 | 450  |
| <b>0464</b> |    |   |     |   |     | 83  | 80   | 1350 | 1350 | 1350 | 150  |
| <b>0464</b> |    |   |     |   |     | 90  | -    | 1350 | 1350 | 1350 | 450  |
| <b>0464</b> |    |   |     |   |     | 118 | 160  | 1350 | 1350 | 1350 | 450  |
| <b>0479</b> | 56 | F | NO  | 1 | NO  | 79  | -    | 1350 | 1350 | 4050 | 450  |
| <b>0488</b> | 37 | F | NO  | 1 | NO  | 62  | -    | 150  | 150  | 0    | 0    |
| <b>0515</b> | 58 | M | YES | 4 | YES | 69  | 80   | 1350 | 1350 | 4050 | 1350 |
| <b>0515</b> |    |   |     |   |     | 83  | -    | 1350 | 1350 | 4050 | 1350 |
| <b>0515</b> |    |   |     |   |     | 104 | 320  | 1350 | 1350 | 4050 | 1350 |
| <b>0524</b> | 35 | F | YES | 3 | YES | 44  | -    | 1350 | 1350 | 4050 | 450  |
| <b>0525</b> | 33 | F | NO  | 2 | YES | 43  | -    | 450  | 50   | 150  | 50   |
| <b>0525</b> |    |   |     |   |     | 68  | -    | 50   | 450  | 150  | 50   |
| <b>0526</b> | 74 | M | NO  | 2 | YES | 45  | -    | 1350 | 1350 | 1350 | 150  |
| <b>0530</b> | 39 | F | NO  | 1 | NO  | 71  | -    | 1350 | 1350 | 450  | 50   |
| <b>0533</b> | 32 | F | NO  | 1 | NO  | 47  | -    | 450  | 450  | 150  | 0    |
| <b>0548</b> | 40 | M | NO  | 4 | NO  | 52  | -    | 1350 | 1350 | 4050 | 150  |
| <b>0554</b> | 68 | F | NO  | 1 | NO  | 57  | -    | 1350 | 1350 | 4050 | 1350 |
| <b>0576</b> | 50 | F | YES | 3 | YES | 41  | 0    | 0    | 0    | 50   | 0    |
| <b>0579</b> | 70 | M | NO  | 2 | YES | 43  | 640  | 1350 | 1350 | 4050 | 450  |

|      |    |   |     |   |     |     |      |      |      |      |      |
|------|----|---|-----|---|-----|-----|------|------|------|------|------|
| 0579 |    |   |     |   |     | 50  | -    | 1350 | 1350 | 1350 | 150  |
| 0579 |    |   |     |   |     | 57  | -    | 1350 | 1350 | 4050 | 450  |
| 0579 |    |   |     |   |     | 64  | 80   | 1350 | 1350 | 1350 | 150  |
| 0579 |    |   |     |   |     | 99  | 160  | 1350 | 1350 | 1350 | 150  |
| 0580 | 43 | F | YES | 3 | YES | 29  | 1280 | 4050 | 4050 | 1350 | 150  |
| 0580 |    |   |     |   |     | 35  | 1280 | 4050 | 4050 | 4050 | 150  |
| 0580 |    |   |     |   |     | 57  | 160  | 1350 | 1350 | 1350 | 50   |
| 0581 | 50 | M | YES | 4 | YES | 108 | -    | 1350 | 1350 | 150  | 50   |
| 0591 | 51 | F | NO  | 1 | NO  | 44  | -    | 450  | 1350 | 450  | 150  |
| 0595 | 26 | F | NO  | 2 | YES | 104 | -    | 150  | 150  | 50   | 0    |
| 0595 |    |   |     |   |     | 111 | -    | 150  | 150  | 50   | 0    |
| 0598 | 46 | M | YES | 4 | YES | 30  | 1280 | 4050 | 4050 | 4050 | 450  |
| 0598 |    |   |     |   |     | 99  | 640  | 1350 | 1350 | 4050 | 150  |
| 0599 | 42 | M | YES | 3 | YES | 82  | 320  | 1350 | 1350 | 1350 | 450  |
| 0599 |    |   |     |   |     | 117 | 320  | 1350 | 1350 | 1350 | 150  |
| 0605 | 54 | F | NO  | 1 | NO  | 58  | -    | 1350 | 1350 | 1350 | 150  |
| 0610 | 48 | F | NO  | 2 | YES | 64  | -    | 1350 | 1350 | 150  | 0    |
| 0612 | 36 | F | NO  | 1 | NO  | 69  | -    | 1350 | 1350 | 50   | 0    |
| 0618 | 58 | F | YES | 5 | YES | 65  | 80   | 1350 | 1350 | 4050 | 450  |
| 0618 |    |   |     |   |     | 118 | 320  | 1350 | 1350 | 1350 | 150  |
| 0620 | 59 | M | YES | 5 | YES | 40  | 1280 | 4050 | 4050 | 4050 | 4050 |
| 0620 |    |   |     |   |     | 52  | 320  | 1350 | 1350 | 4050 | 1350 |
| 0620 |    |   |     |   |     | 59  | 320  | 1350 | 1350 | 4050 | 1350 |
| 0620 |    |   |     |   |     | 66  | 160  | 1350 | 1350 | 4050 | 1350 |
| 0620 |    |   |     |   |     | 73  | 160  | 1350 | 1350 | 4050 | 450  |
| 0620 |    |   |     |   |     | 94  | 320  | 1350 | 1350 | 450  | 450  |
| 0620 |    |   |     |   |     | 101 | --   | 1350 | 1350 | 4050 | 150  |
| 0620 |    |   |     |   |     | 108 | 320  | 1350 | 1350 | 1350 | 150  |
| 0622 | 20 | F | NO  | 1 | NO  | 45  | 0    | 450  | 150  | 50   | 0    |
| 0622 |    |   |     |   |     | 52  | -    | 450  | 150  | 50   | 0    |
| 0622 |    |   |     |   |     | 77  | 0    | 1350 | 450  | 150  | 0    |
| 0631 | 58 | M | NO  | 1 | NO  | 47  | 20   | 150  | 450  | 150  | 50   |
| 0631 |    |   |     |   |     | 53  | 20   | 150  | 1350 | 50   | 50   |
| 0631 |    |   |     |   |     | 61  | 20   | 1350 | 1350 | 50   | 0    |
| 0631 |    |   |     |   |     | 67  | 20   | 1350 | 150  | 50   | 0    |
| 0631 |    |   |     |   |     | 74  | 10   | 450  | 1350 | 50   | 0    |
| 0631 |    |   |     |   |     | 81  | 20   | 450  | 450  | 50   | 0    |
| 0631 |    |   |     |   |     | 95  | 0    | 450  | 450  | 50   | 0    |
| 0631 |    |   |     |   |     | 108 | -    | 150  | 50   | 50   | 0    |
| 0631 |    |   |     |   |     | 117 | 0    | 450  | 450  | 50   | 0    |
| 0631 |    |   |     |   |     | 122 | -    | 450  | 150  | 50   | 0    |
| 0633 | 63 | M | YES | 4 | YES | 79  | -    | 1350 | 1350 | 1350 | 150  |
| 0634 | 53 | M | YES | 5 | YES | 33  | 1280 | 4050 | 4050 | 4050 | 450  |

|             |    |   |     |   |     |     |     |      |      |      |     |
|-------------|----|---|-----|---|-----|-----|-----|------|------|------|-----|
| <b>0636</b> | 30 | M | NO  | 2 | YES | 64  | -   | 1350 | 1350 | 1350 | 450 |
| <b>0664</b> | 46 | M | NO  | 1 | NO  | 75  | -   | 1350 | 1350 | 1350 | 50  |
| <b>0664</b> |    |   |     |   |     | 86  | -   | 1350 | 1350 | 1350 | 50  |
| <b>0694</b> | 30 | M | NO  | 2 | YES | 42  | 320 | 1350 | 1350 | 1350 | 150 |
| <b>0694</b> |    |   |     |   |     | 127 | 160 | 1350 | 1350 | 1350 | 50  |
| <b>0695</b> | 22 | F | NO  | 2 | YES | 62  | 0   | 0    | 1350 | 150  | 0   |
| <b>0695</b> |    |   |     |   |     | 72  | -   | 450  | 1350 | 150  | 0   |
| <b>0695</b> |    |   |     |   |     | 79  | -   | 450  | 450  | 150  | 0   |
| <b>0695</b> |    |   |     |   |     | 114 | 0   | 450  | 150  | 150  | 0   |
| <b>0695</b> |    |   |     |   |     | 128 | -   | 450  | 450  | 150  | 0   |
| <b>0698</b> | 32 | M | NO  | 2 | YES | 51  | 320 | 1350 | 1350 | 450  | 150 |
| <b>0698</b> |    |   |     |   |     | 59  | -   | 1350 | 1350 | 450  | 150 |
| <b>0698</b> |    |   |     |   |     | 72  | -   | 1350 | 450  | 450  | 50  |
| <b>0698</b> |    |   |     |   |     | 100 | 40  | 1350 | 150  | 450  | 150 |
| <b>0699</b> | 61 | M | YES | 3 | NO  | 35  | 640 | 4050 | 450  | 450  | 450 |
| <b>0701</b> | 41 | M | NO  | 1 | NO  | 47  | 80  | 1350 | 1350 | 450  | 150 |
| <b>0701</b> |    |   |     |   |     | 53  | 40  | 1350 | 1350 | 1350 | 150 |
| <b>0701</b> |    |   |     |   |     | 63  | 40  | 1350 | 1350 | 450  | 150 |
| <b>0701</b> |    |   |     |   |     | 70  | 40  | 1350 | 1350 | 450  | 150 |
| <b>0701</b> |    |   |     |   |     | 74  | 80  | 1350 | 1350 | 150  | 150 |
| <b>0701</b> |    |   |     |   |     | 105 | 20  | 1350 | 450  | 450  | 50  |
| <b>0701</b> |    |   |     |   |     | 109 | -   | 1350 | 1350 | 50   | 0   |
| <b>0701</b> |    |   |     |   |     | 116 | 20  | 1350 | 450  | 450  | 50  |
| <b>0701</b> |    |   |     |   |     | 123 | -   | 1350 | 1350 | 450  | 50  |
| <b>0719</b> | 63 | M | NO  | 1 | NO  | 107 | -   | 1350 | 1350 | 50   | 0   |
| <b>0719</b> |    |   |     |   |     | 114 | -   | 1350 | 1350 | 50   | 0   |
| <b>0720</b> | 39 | M | NO  | 2 | YES | 63  | -   | 50   | 0    | 0    | 0   |
| <b>0731</b> | 50 | M | YES | 4 | YES | 66  | 80  | 1350 | 1350 | 4050 | 450 |
| <b>0731</b> |    |   |     |   |     | 73  | 40  | 1350 | 1350 | 4050 | 150 |
| <b>0731</b> |    |   |     |   |     | 80  | 40  | 1350 | 1350 | 1350 | 50  |
| <b>0731</b> |    |   |     |   |     | 87  | 80  | 1350 | 1350 | 450  | 150 |
| <b>0731</b> |    |   |     |   |     | 94  | 40  | 1350 | 1350 | 1350 | 150 |
| <b>0731</b> |    |   |     |   |     | 101 | -   | 1350 | 1350 | 4050 | 150 |
| <b>0731</b> |    |   |     |   |     | 115 | 160 | 1350 | 1350 | 1350 | 150 |
| <b>0731</b> |    |   |     |   |     | 128 | -   | 1350 | 1350 | 1350 | 150 |
| <b>0731</b> |    |   |     |   |     | 142 | -   | 1350 | 1350 | 450  | 50  |
| <b>0749</b> | 45 | M | NO  | 1 | NO  | 48  | -   | 450  | 1350 | 450  | 0   |
| <b>0749</b> |    |   |     |   |     | 55  | -   | 450  | 1350 | 450  | 0   |
| <b>0749</b> |    |   |     |   |     | 69  | -   | 450  | 450  | 150  | 50  |
| <b>0750</b> | 29 | M | NO  | 2 | YES | 46  | -   | 450  | 150  | 150  | 150 |
| <b>0750</b> |    |   |     |   |     | 50  | -   | 450  | 150  | 450  | 50  |
| <b>0750</b> |    |   |     |   |     | 53  | -   | 150  | 1350 | 150  | 50  |
| <b>0750</b> |    |   |     |   |     | 123 | 0   | 450  | 450  | 50   | 50  |

|             |    |   |     |   |     |     |     |      |      |      |      |
|-------------|----|---|-----|---|-----|-----|-----|------|------|------|------|
| <b>0759</b> | 48 | F | NO  | 2 | YES | 45  | -   | 1350 | 1350 | 450  | 150  |
| <b>0762</b> | 47 | M | NO  | 2 | YES | 44  | 160 | 450  | 1350 | 1350 | 50   |
| <b>0762</b> |    |   |     |   |     | 51  | 40  | 1350 | 1350 | 1350 | 150  |
| <b>0762</b> |    |   |     |   |     | 58  | 80  | 1350 | 1350 | 450  | 150  |
| <b>0762</b> |    |   |     |   |     | 64  | 160 | 1350 | 1350 | 450  | 150  |
| <b>0762</b> |    |   |     |   |     | 78  | 160 | 1350 | 1350 | 1350 | 50   |
| <b>0762</b> |    |   |     |   |     | 85  | -   | 1350 | 1350 | 150  | 0    |
| <b>0762</b> |    |   |     |   |     | 92  | 40  | 1350 | 1350 | 450  | 0    |
| <b>0762</b> |    |   |     |   |     | 113 | 80  | 1350 | 1350 | 450  | 0    |
| <b>0786</b> | 46 | F | NO  | 2 | YES | 48  | -   | 450  | 1350 | 1350 | 150  |
| <b>0789</b> | 55 | F | NO  | 2 | YES | 62  | -   | 1350 | 1350 | 1350 | 150  |
| <b>0796</b> | 45 | M | YES | 5 | YES | 52  | -   | 1350 | 1350 | 1350 | 450  |
| <b>0820</b> | 56 | F | NO  | 1 | NO  | 82  | -   | 1350 | 1350 | 450  | 50   |
| <b>0820</b> |    |   |     |   |     | 113 | -   | 1350 | 1350 | 450  | 50   |
| <b>0834</b> | 48 | M | NO  | 2 | YES | 60  | -   | 1350 | 1350 | 4050 | 450  |
| <b>0835</b> | 52 | F | YES | 5 | YES | 61  | -   | 1350 | 1350 | 4050 | 4050 |
| <b>0838</b> | 74 | F | NO  | 1 | NO  | 49  | 320 | 1350 | 1350 | 1350 | 450  |
| <b>0838</b> |    |   |     |   |     |     | 160 | 1350 | 1350 | 1350 | 450  |
| <b>0838</b> |    |   |     |   |     |     | 160 | 1350 | 1350 | 450  | 450  |
| <b>0838</b> |    |   |     |   |     |     | 80  | 1350 | 1350 | 1350 | 450  |
| <b>0838</b> |    |   |     |   |     |     | 320 | 1350 | 1350 | 1350 | 150  |
| <b>0838</b> |    |   |     |   |     |     | -   | 1350 | 1350 | 1350 | 150  |
| <b>0838</b> |    |   |     |   |     |     | 160 | 1350 | 1350 | 450  | 150  |
| <b>0850</b> | 34 | F | NO  | 2 | YES | 67  | -   | 1350 | 1350 | 1350 | 150  |
| <b>0879</b> | 50 | M | YES | 4 | YES | 34  | 160 | 4050 | 4050 | 4050 | 4050 |
| <b>0879</b> |    |   |     |   |     |     | -   | 1350 | 1350 | 4050 | 1350 |
| <b>0905</b> | 41 | F | NO  | 1 | NO  | 57  | -   | 1350 | 1350 | 150  | 0    |
| <b>0913</b> | 34 | F | YES | 5 | YES | 83  | -   | 1350 | 1350 | 4050 | 450  |
| <b>0913</b> |    |   |     |   |     | 90  | -   | 1350 | 1350 | 4050 | 150  |
| <b>0913</b> |    |   |     |   |     | 101 | -   | 1350 | 1350 | 4050 | 150  |
| <b>0913</b> |    |   |     |   |     | 116 | -   | 1350 | 1350 | 1350 | 0    |
| <b>0933</b> | 67 | M | NO  | 1 | NO  | 65  | -   | 1350 | 1350 | 4050 | 450  |
| <b>0970</b> | 29 | F | NO  | 2 | YES | 56  | -   | 1350 | 1350 | 1350 | 50   |
| <b>0992</b> | 45 | F | NO  | 2 | YES | 43  | -   | 0    | 0    | 0    | 0    |
| <b>0992</b> |    |   |     |   |     | 49  | -   | 0    | 0    | 0    | 0    |
| <b>1033</b> | 33 | F | NO  | 1 | NO  | 61  | 80  | 1350 | 1350 | 1350 | 1350 |
| <b>1033</b> |    |   |     |   |     | 75  | -   | 1350 | 450  | 150  | 0    |
| <b>1033</b> |    |   |     |   |     | 92  | 80  | 1350 | 1350 | 1350 | 450  |
| <b>1052</b> | 28 | F | NO  | 2 | YES | 59  | 40  | 1350 | 1350 | 1350 | 50   |
| <b>1052</b> |    |   |     |   |     | 73  | -   | 150  | 1350 | 450  | 50   |
| <b>1052</b> |    |   |     |   |     | 95  | 160 | 1350 | 1350 | 1350 | 50   |
| <b>1062</b> | 44 | F | NO  | 2 | YES | 53  | 40  | 1350 | 1350 | 450  | 50   |
| <b>1062</b> |    |   |     |   |     | 88  | -   | 1350 | 1350 | 150  | 0    |

|      |    |   |     |   |     |     |    |      |      |      |      |
|------|----|---|-----|---|-----|-----|----|------|------|------|------|
| 1062 |    |   |     |   |     | 93  | 20 | 450  | 150  | 150  | 0    |
| 1062 |    |   |     |   |     | 98  | -  | 450  | 450  | 150  | 0    |
| 1062 |    |   |     |   |     | 112 | -  | 450  | 450  | 150  | 0    |
| 1062 |    |   |     |   |     | 119 | 0  | 1350 | 150  | 150  | 0    |
| 1062 |    |   |     |   |     | 126 | -  | 1350 | 1350 | 50   | 0    |
| 1121 | 28 | F | YES | 4 | YES | 71  | 0  | 1350 | 1350 | 0    | 0    |
| 1121 |    |   |     |   |     | 78  | -  | 0    | 0    | 0    | 0    |
| 1121 |    |   |     |   |     | 89  | -  | 0    | 0    | 0    | 0    |
| 1121 |    |   |     |   |     | 96  | 0  | 0    | 50   | 0    | 0    |
| 1145 | 39 | F | NO  | 2 | YES | 66  | 0  | 1350 | 1350 | 450  | 0    |
| 1145 |    |   |     |   |     | 73  | -  | 1350 | 1350 | 450  | 0    |
| 1145 |    |   |     |   |     | 80  | -  | 1350 | 450  | 450  | 0    |
| 1145 |    |   |     |   |     | 94  | 40 | 1350 | 1350 | 450  | 50   |
| 1145 |    |   |     |   |     | 101 | -  | 1350 | 1350 | 450  | 0    |
| 1145 |    |   |     |   |     | 115 | 20 | 1350 | 1350 | 450  | 0    |
| 1215 | 54 | M | NO  | 1 | NO  | 79  | 40 | 1350 | 1350 | 450  | 150  |
| 1215 |    |   |     |   |     | 109 | 80 | 1350 | 1350 | 150  | 50   |
| 1234 | 49 | F | NO  | 2 | YES | 38  | -  |      | 1350 | 4050 | 1350 |
| 1234 |    |   |     |   |     | 44  | -  | 1350 | 1350 | 4050 | 150  |
| 1234 |    |   |     |   |     | 52  | -  | 1350 | 1350 | 4050 | 450  |
| 1234 |    |   |     |   |     | 60  | -  | 1350 | 1350 | 4050 | 150  |
| 1234 |    |   |     |   |     | 68  | -  | 1350 | 1350 | 4050 | 150  |
| 1234 |    |   |     |   |     | 82  | -  | 1350 | 1350 | 4050 | 150  |
| 1234 |    |   |     |   |     | 94  | -  | 1350 | 1350 | 450  | 0    |
| 1278 | 23 | M | NO  | 1 | NO  | 64  | -  | 50   | 1350 | 50   | 0    |
| 1278 |    |   |     |   |     | 74  | -  | 1350 | 1350 | 150  | 0    |
| 1278 |    |   |     |   |     | 81  | -  | 1350 | 1350 | 150  | 0    |
| 1278 |    |   |     |   |     | 95  | -  | 1350 | 450  | 150  | 0    |
| 1278 |    |   |     |   |     | 116 | -  | 1350 | 450  | 150  | 0    |
| 1278 |    |   |     |   |     | 130 | -  | 1350 | 450  | 150  | 0    |
| 1288 | 27 | F | NO  | 2 | YES | 47  | -  | 1350 | 1350 | 1350 | 150  |
| 1288 |    |   |     |   |     | 54  | -  | 1350 | 1350 | 1350 | 150  |
| 1288 |    |   |     |   |     | 61  | -  | 1350 | 1350 | 1350 | 150  |
| 1288 |    |   |     |   |     | 68  | -  | 1350 | 450  | 450  | 0    |
| 1288 |    |   |     |   |     | 81  | 80 | 1350 | 1350 | 450  | 50   |
| 1344 | 32 | F | NO  | 1 | NO  | 63  | 20 | 1350 | 450  | 450  | 50   |
| 1344 |    |   |     |   |     | 105 | 0  | 1350 | 1350 | 150  | 0    |
| 1401 |    |   |     |   |     | 87  | -  | 0    | 0    | 1350 | 150  |
| 1401 |    |   |     |   |     | 102 | -  | 1350 | 450  | 1350 | 50   |
| 1432 | 54 | M | NO  | 1 | NO  | 58  | 80 | 1350 | 1350 | 1350 | 150  |
| 1432 |    |   |     |   |     | 84  | 40 | 1350 | 450  | 450  | 50   |
| 1457 | 23 | M | NO  | 1 | NO  | 80  | -  | 1350 | 1350 | 150  | 0    |
| 1457 |    |   |     |   |     | 87  | -  | 450  | 150  | 150  | 0    |
| 1457 |    |   |     |   |     | 94  | -  | 1350 | 1350 | 450  | 50   |



|      |    |   |     |   |     |     |     |      |      |      |     |
|------|----|---|-----|---|-----|-----|-----|------|------|------|-----|
| 1457 |    |   |     |   |     | 101 | -   | 450  | 1350 | 50   | 0   |
| 1457 |    |   |     |   |     | 108 | -   | 1350 | 450  | 150  | 0   |
| 1457 |    |   |     |   |     | 122 | -   | 1350 | 1350 | 150  | 0   |
| 1462 | 70 | M | NO  | 1 | NO  | 72  | -   | 1350 | 1350 | 450  | 50  |
| 1462 |    |   |     |   |     | 79  | 80  | 1350 | 1350 | 450  | 50  |
| 1462 |    |   |     |   |     | 86  | -   | 450  | 450  | 450  | 50  |
| 1462 |    |   |     |   |     | 93  | -   | 1350 | 450  | 450  | 50  |
| 1462 |    |   |     |   |     | 100 | 20  | 150  | 1350 | 450  | 0   |
| 1462 |    |   |     |   |     | 107 | -   | 1350 | 450  | 150  | 0   |
| 1462 |    |   |     |   |     | 114 | 0   | 450  | 1350 | 450  | 50  |
| 1499 | 42 | M | NO  | 1 | NO  | 79  | 20  | 1350 | 1350 | 450  | 50  |
| 1499 |    |   |     |   |     | 94  | 0   | 1350 | 450  | 450  | 0   |
| 1551 | 50 | M | YES | 5 | YES | 65  | -   | 1350 | 1350 | 4050 | 450 |
| 1551 |    |   |     |   |     | 70  | 320 | 1350 | 1350 | 4050 | 450 |
| 1551 |    |   |     |   |     | 76  | -   | 1350 | 1350 | 1350 | 150 |
| 1551 |    |   |     |   |     | 83  | -   | 1350 | 1350 | 4050 | 450 |
| 1551 |    |   |     |   |     | 89  | 320 | 1350 | 1350 | 4050 | 450 |
| 1551 |    |   |     |   |     | 97  | -   | 1350 | 1350 | 0    | 0   |
| 1551 |    |   |     |   |     | 104 | -   | 1350 | 1350 | 1350 | 150 |
| 1551 |    |   |     |   |     | 111 | 160 | 1350 | 1350 | 450  | 150 |
| 1678 | 48 | F | NO  | 2 | YES | 54  | -   | 1350 | 1350 | 450  | 150 |
| 1678 |    |   |     |   |     | 85  | -   | 1350 | 1350 | 1350 | 450 |
| 1678 |    |   |     |   |     | 92  | -   | 1350 | 1350 | 1350 | 150 |
| 1817 | 28 | F | NO  | 1 | NO  | 44  | -   | 1350 | 1350 | 450  | 150 |
| 1817 |    |   |     |   |     | 51  | -   | 1350 | 1350 | 1350 | 450 |
| 1817 |    |   |     |   |     | 63  | -   | 1350 | 1350 | 1350 | 450 |

DPO Days post onset of symptoms; S/ECD Spike ectodomain; S/RBD Spike receptor-binding domain;  
 VN Virus neutralization

**Supplementary Table 2:** Predictive values and likelihood ratios of the ELISA methods as a surrogate for virus neutralizing antibody titer of  $\geq 160$ .

| DPO                      | Effect | S/ECD $\geq 1350$ |              | S/RBD $\geq 1350$ |              | S/RBD IgG $\geq 1350$ |              | S/RBD IgM $\geq 450$ |              |
|--------------------------|--------|-------------------|--------------|-------------------|--------------|-----------------------|--------------|----------------------|--------------|
|                          |        | Value             | 95% CI       | Value             | 95% CI       | Value                 | 95% CI       | Value                | 95% CI       |
| <b>Overall<br/>0-142</b> | PPV    | 0.52              | 0.46 to 0.59 | 0.57              | 0.50 to 0.63 | 0.72                  | 0.65 to 0.79 | 0.38                 | 0.30 to 0.46 |
|                          | NPV    | 0.75              | 0.65 to 0.83 | 0.87              | 0.78 to 0.92 | 0.82                  | 0.75 to 0.87 | 0.90                 | 0.84 to 0.94 |
|                          | LR+    | 1.34              |              | 1.61              |              | 3.18                  |              | 3.72                 |              |
|                          | LR-    | 0.40              |              | 0.19              |              | 0.26                  |              | 0.69                 |              |
| <b>1-30</b>              | PPV    | 0.92              | 0.65 to 1.00 | 0.94              | 0.72 to 0.99 | 0.78                  | 0.55 to 0.91 | 1.00                 | 0.68 to 1.00 |
|                          | NPV    | 0.67              | 0.47 to 0.82 | 0.80              | 0.58 to 0.92 | 0.65                  | 0.43 to 0.82 | 0.56                 | 0.39 to 0.73 |
|                          | LR+    | 9.85              |              | 13.43             |              | 2.83                  |              | -                    |              |
|                          | LR-    | 0.45              |              | 0.22              |              | 0.44                  |              | 0.62                 |              |
| <b>31-60</b>             | PPV    | 0.79              | 0.67 to 0.88 | 0.69              | 0.57 to 0.78 | 0.73                  | 0.61 to 0.82 | 0.90                 | 0.74 to 0.96 |
|                          | NPV    | 0.56              | 0.41 to 0.70 | 0.72              | 0.52 to 0.83 | 0.72                  | 0.55 to 0.84 | 0.55                 | 0.43 to 0.66 |
|                          | LR+    | 1.80              |              | 1.56              |              | 1.92                  |              | 6.23                 |              |
|                          | LR-    | 0.38              |              | 0.28              |              | 0.28                  |              | 0.59                 |              |
| <b>61-90</b>             | PPV    | 0.32              | 0.23 to 0.43 | 0.35              | 0.25 to 0.47 | 0.58                  | 0.41 to 0.72 | 0.50                 | 0.31 to 0.69 |
|                          | NPV    | 1.00              | 0.65 to 1.00 | 1.00              | 0.74 to 1.00 | 0.90                  | 0.79 to 0.96 | 0.78                 | 0.66 to 0.86 |
|                          | LR+    | 1.13              |              | 1.30              |              | 3.20                  |              | 2.40                 |              |
|                          | LR-    | 0.00              |              | 0.00              |              | 0.27                  |              | 0.69                 |              |
| <b>91-120</b>            | PPV    | 0.52              | 0.40 to 0.64 | 0.61              | 0.48 to 0.73 | 0.87                  | 0.71 to 0.95 | 0.80                 | 0.49 to 0.96 |
|                          | NPV    | 1.00              | 0.77 to 1.00 | 1.00              | 0.85 to 1.00 | 0.87                  | 0.74 to 0.94 | 0.62                 | 0.50 to 0.73 |
|                          | LR+    | 1.43              |              | 2.05              |              | 8.80                  |              | 5.21                 |              |
|                          | LR-    | 0.00              |              | 0.00              |              | 0.20                  |              | 0.79                 |              |
| <b>&gt;120</b>           | PPV    | 0.43              | 0.16 to 0.75 | 0.43              | 0.16 to 0.75 | 0.75                  | 0.30 to 0.99 | 0.00                 | 0.00 to 0.95 |
|                          | NPV    | 1.00              | 0.05 to 1.00 | 1.00              | 0.05 to 1.00 | 1.00                  | 0.51 to 1.00 | 0.57                 | 0.25 to 0.84 |
|                          | LR+    | 1.25              |              | 1.25              |              | 5.00                  |              | 0.00                 |              |
|                          | LR-    | 0.00              |              | 0.00              |              | 0.00                  |              | 1.25                 |              |

DPO Days post onset of symptoms; S/ECD Spike ectodomain; S/RBD Spike receptor-binding domain; PPV Positive predictive value; NPV Negative predictive value; LR+ Positive likelihood ratio; LR- Negative likelihood ratio
